# Supplementary material
Source: PubMed Central journal article supplement (PMC2781603)

## SUPPLEMENTARY DATA

### TRANSLOCATOR PROTEIN 2 IS INVOLVED IN CHOLESTEROL REDISTRIBUTION DURING ERYTHROPOIESIS

Jinjiang Fan, Malena B. Rone and Vassilios Papadopoulos

#### SUPPLEMENTAL EXPERIMENTAL PROCEDURES

**Sequence selection and alignment** - The TSPO homologous sequences were retrieved from the non-redundant GenBank database through BLAST searches (<http://www.ncbi.nlm.nih.gov>). The predicted protein sequence of human TSPO was used as the query sequence. The same sequence was also used to search other individual organism genomes. In addition, orthologous genes of TSPO, which are the representatives of each class of invertebrates, were also selected for comparison. Accession number of each gene used in following analysis is shown in supplementary Table 1. Protein and DNA sequences from GenBank (<http://www.ncbi.nlm.nih.gov>) were aligned using Clustal X (1). Codon-based alignment was made manually with the introduction of small internal deletions and/or gaps to optimize the alignment, or using PAL2NAL, a program that converts a multiple sequence alignment of proteins and the corresponding DNA (or mRNA) sequences into a codon alignment format (<http://coot.embl.de/pal2nal>) (2).

#### SUPPLEMENTAL RESULTS AND DISCUSSION

##### **Identification of new *Tspo* homologs by exploration of the non-redundant gene databases**

- To identify *Tspo* genes homologs, we used the predicted amino acid sequence of the human *Tspo* gene to search public databases using PSI-BLAST (<http://www.ncbi.nlm.nih.gov>). Sequence similarity indicated that *Tspo*-like genes are present in genomes spanning from birds to mammals. After excluding redundant sequences, *Tspo*-like genes from unique genomes were selected for comparison. Predicted protein sequences of each newly identified *Tspo*-like gene were aligned with previously characterized TSPO

proteins (Figure S1). Basic sequence features, such as the five transmembrane domains with a high degree of amino acid conservation throughout different organisms and high sequence similarity (Tables S1 and S3), suggested that the identified *Tspo*-like genes are closely related *Tspo*-like sequences. Because of the recent nomenclature change of PBR to TSPO(3), we designated the PBR-like (*Pbrl1*) genes as *Tspo2* and the previous *Tspo* gene as *Tspo1*. These data also predict that TSPO2 is more hydrophobic than TSPO1. However, both likely share a similar secondary structure.

To define domain structures of the identified *Tspo2* members, the predicted amino acid sequence of each was used to search the Pfam database using HMMER set to the “global and local alignment separately” mode. Based on a raw score threshold, “gathering threshold” (GA cutoff), all of the TSPO2 proteins match with the TSPO/PBR family. Thus, the sequence alignments and database searches indicated that *Tspo2* genes are members of the *Tspo* gene family (Table S1).

##### ***Tspo2* and *Tspo1* involve distinct gene networks**

- To investigate whether the *Tspo2* gene family is expressed, we searched the express sequence tags (ESTs) database using BLASTN (<http://www.ncbi.nlm.nih.gov/dbEST>). Almost all *Tspo2* genes detected in the dbEST database are listed in Table S3. Expression of human and mouse *Tspo2* seemed tissue-specific in erythroid cells. We then exploited the availability of an integrated protein interaction network database (4) and found that *TSPO2* (Gene ID no. 222642) has 703 interactions among 43 proteins, whereas *TSPO1* (Gene ID no.: 706) has 150 interactions among 40 proteins (Figure S2A). Many aspects of *Tspo1* biological functions appeared to be reflected in this gene network, such as mitochondrial localized proteins [VDAC1-3, voltage-dependent anion channel 1-3; translocase of outer mitochondrial membrane 20 homolog and 22 homolog (TOMM20 and 22); translocase of

inner mitochondrial membrane 17 homolog B and 44 homolog (TIMM17B and 44)], lipid metabolism and cholesterol transport [lipase A (LIPA), lysosomal acid, cholesterol esterase; retinoid X receptor alpha (RXRA), acyl-CoA thioesterase 9 (ACATE2)], apoptosis, cell signaling, and cell proliferation [myeloid cell leukemia sequence 1 (MCL1); and PYCARD, PYD, and CARD domain containing proteins], as well as nuclear transport [nucleoporin 214 kDa (NUP214)] (Figure S2A). However, the gene network of *TSPO2* was indicative of an erythroid cell-related gene network (Fig. S2A), in which 27 of 43 proteins are erythrocyte-related, including EPB41, BSG, SPTA1, EIF2AK1, SLC22A4, and XPO7. These genes were confirmed to be erythroid cell-specific by two independent studies (5,6). Details of genes closely related to *Tspo1* and 2, and involved in these two networks are available in Tables S4 and S5. Although the involvement of these genes should be experimentally tested, *TSPO2* is likely involved in

erythrocyte differentiation and cholesterol transport and/or synthesis. Notably, 1 of the 43 genes within this gene network is oxysterol binding protein 2 (OSBP2), which regulates cellular metabolism, binding, and transport of cholesterol in mammals (7,8) and the synthesis of ergosterol, the yeast counterpart of cholesterol, in yeast (9-11).

Additionally, sequence alignments between a partial N-terminal peptide sequence of a TSPO1-like integral membrane protein, previously designated p18, from avian erythrocytes with TSPO2 and TSPO1 proteins showed that p18 is not the orthologous gene of *Tspo1* but the avian *Tspo2* protein (Figure S2B). In a previous report, we found that p18 is involved in a nuclear multimeric complex with lamin-B receptor (LBR, p58), the nuclear lamins, and a LBR-specific kinase (12). These observations suggest that *Tspo2* has functions and cellular localization distinct from those of *Tspo1*.

## Supplemental References

1. Thompson, J. D., Gibson, T. J., Plewniak, F., Jeanmougin, F., and Higgins, D. G. (1997) *Nucleic Acids Res.* **25**(24), 4876-4882
2. Suyama, M., Torrents, D., and Bork, P. (2006) *Nucleic Acids Res.* **34**(Web Server issue), W609-W612
3. Papadopoulos, V., Baraldi, M., Guilarte, T. R., Knudsen, T. B., Lacapere, J. J., Lindemann, P., Norenberg, M. D., Nutt, D., Weizman, A., Zhang, M. R., and Gavish, M. (2006) *Trends Pharmacol. Sci.* **27**(8), 402-409
4. Xia, K., Dong, D., and Han, J. D. (2006) *BMC. Bioinformatics.* **7**, 508
5. Komor, M., Guller, S., Baldus, C. D., de, V. S., Hoelzer, D., Ottmann, O. G., and Hofmann, W. K. (2005) *Cell Stem Cell* **23**(8), 1154-1169
6. Chambers, S. M., Boles, N. C., Lin, K.-Y., Tierney, M. P., Bowman, T. V., Bradfute, S. B., Chen, A. J., Merchant, A. A., Sirin, O., Weksberg, D. C., Merchant, M. G., Fisk, C. J., Shaw, C. A., and Goodell, M. A. (2007) *Cell Stem Cell* **1**(5), 578-591
7. Laitinen, S., Lehto, M., Lehtonen, S., Hyvarinen, K., Heino, S., Lehtonen, E., Ehnholm, C., Ikonen, E., and Olkkonen, V. M. (2002) *J. Lipid Res.* **43**(2), 245-255
8. Hynynen, R., Laitinen, S., Kakela, R., Tanhuanpaa, K., Lusa, S., Ehnholm, C., Somerharju, P., Ikonen, E., and Olkkonen, V. M. (2005) *Biochem. J.* **390**(Pt 1), 273-283
9. Lehto, M., Laitinen, S., Chinetti, G., Johansson, M., Ehnholm, C., Staels, B., Ikonen, E., and Olkkonen, V. M. (2001) *J. Lipid Res.* **42**(8), 1203-1213
10. Fairn, G. D. and McMaster, C. R. (2008) *Cell Mol. Life Sci.* **65**(2), 228-236
11. Schulz, T. A. and Prinz, W. A. (2007) *Biochim. Biophys. Acta* **1771**(6), 769-780
12. Simos, G., Maison, C., and Georgatos, S. D. (1996) *J. Biol. Chem.* **271**(21), 12617-12625
13. Riond, J., Mattei, M. G., Kaghad, M., Dumont, X., Guillemot, J. C., Le Fur, G., Caput, D., and Ferrara, P. (1991) *Eur. J. Biochem.* **195**(2), 305-311
14. Garnier, M., Dimchev, A. B., Boujrad, N., Price, J. M., Musto, N. A., and Papadopoulos, V. (1994) *Mol. Pharmacol.* **45**(2), 201-211
15. Sprengel, R., Werner, P., Seeburg, P. H., Mukhin, A. G., Santi, M. R., Grayson, D. R., Guidotti, A., and Krueger, K. E. (1989) *J. Biol. Chem.* **264**(34), 20415-20421
16. Zhang, K., Demeure, O., Belliard, A., Goujon, J. M., Favreau, F., Desurmont, T., Mauco, G., Barriere, M., Carretier, M., Milan, D., Papadopoulos, V., and Hauet, T. (2006) *Mamm. Genome* **17**(10), 1050-1062

17. Parola, A. L., Stump, D. G., Pepperl, D. J., Krueger, K. E., Regan, J. W., and Laird, H. E. (1991) *J. Biol. Chem.* **266**(21), 14082-14087
18. Lindemann, P., Koch, A., Degenhardt, B., Hause, G., Grimm, B., and Papadopoulos, V. (2004) *Plant Cell Physiol.* **45**(6), 723-733
19. Corsi, L., Avallone, R., Geminiani, E., Cosenza, F., Venturini, I., and Baraldi, M. (2004) *Biochem. Biophys. Res. Commun.* **313**(1), 62-66
20. Higgins, D. G., Bleasby, A. J., and Fuchs, R. (1992) *Comput. Appl. Biosci.* **8**(2), 189-191
21. Li, H. and Papadopoulos, V. (1998) *Endocrinology* **139**(12), 4991-4997
22. Konvicka, K., Campagne, F., and Weinstein, H. (2000) *Protein Eng.* **13**(6), 395-396

**Table S1.** Accession numbers of the genes used in this study

**Table S2.** Oligonucleotides used in this study

**Table S3.** Comparison of the characteristics of TSPO1 and TSPO2

**Table S4.** A list of genes involved in the human TSPO1 gene network.

**Table S5.** A list of genes involved in the human TSPO2 gene network.

**Table S1. Accession numbers of the genes used in this study**

| <b>Abbreviation<sup>a</sup></b> | <b>Species</b>                   | <b>Accession No.</b> | <b>References</b> |
|---------------------------------|----------------------------------|----------------------|-------------------|
| <b>Vertebrates</b>              |                                  |                      |                   |
| TSPO1_humans                    | <i>Homo sapiens</i>              | NM_000714            | (13)              |
| TSPO1_mouse                     | <i>Mus musculus</i>              | P50637               | (14)              |
| TSPO1_rat                       | <i>Rattus norvegicus</i>         | NP_036647            | (15)              |
| TSPO1_pig                       | <i>Sus scrofa</i>                | NP_998918            | (16)              |
| TSPO1_dog                       | <i>Canis familiaris</i>          | XP_531704            | -                 |
| TSPO1_sheep                     | <i>Ovis aries</i>                | NP_001009747         | -                 |
| TSPO1_Monodelphis               | <i>Monodelphis domestica</i>     | XP_001369931         | -                 |
| TSPO1_bovine                    | <i>Bos taurus</i>                | NP_786970            | (17)              |
| TSPO1_Gallus                    | <i>Gallus gallus</i>             | XP_416451            | -                 |
| TSPO1_Xenopus                   | <i>Xenopus laevis</i>            | AAH41505             | -                 |
| TSPO1_Danio                     | <i>Danio rerio</i>               | NP_001006032         | -                 |
| TSPO1_Oncorhynchus              | <i>Oncorhynchus mykiss</i>       | AAK31586             | -                 |
| TSPO1_Tetraodon                 | <i>Tetraodon nigroviridis</i>    | CAG06923             | -                 |
| TSPO2_humans                    | <i>H. Sapiens</i>                | NP_001010873         | -                 |
| TSPO2_pig                       | <i>S. scrofa</i>                 | N166970              | -                 |
| TSPO2_dog                       | <i>C. familiaris</i>             | XP_538908            | -                 |
| TSPO2_rat                       | <i>R. norvegicus</i>             | XP_001063305         | -                 |
| TSPO2_mouse                     | <i>M. Musculus</i>               | NP_081568            | -                 |
| TSPO2_Monodelphis               | <i>M. domestica</i>              | XP_001379628         | -                 |
| TSPO2_Gallus                    | <i>G. gallus</i>                 | XP_418037            | -                 |
| <b>Plants</b>                   |                                  |                      |                   |
| TSPO_Arabidopsis                | <i>Arabidopsis thaliana</i>      | NP_566110            | (18)              |
| TSPO_Solanum                    | <i>Solanum tuberosum</i>         | CAH10765             | (19)              |
| <b>Nematoda</b>                 |                                  |                      |                   |
| TSPO_briggsae                   | <i>Caenorhabditis briggsae</i>   | CAE56706             | -                 |
| TSPO_elegans                    | <i>C. elegans</i>                | NP_492528            | -                 |
| <b>Insects</b>                  |                                  |                      |                   |
| TSPO_Anopheles                  | <i>Anopheles gambiae</i>         | XP_310673            | -                 |
| TSPO_Bombyx                     | <i>Bombyx mori</i>               | NP_001040343         | -                 |
| TSPO_Drosophila                 | <i>Drosophila melanogaster</i>   | NP_608531            | -                 |
| <b>Fungi</b>                    |                                  |                      |                   |
| TSPO_Cryptococcus               | <i>Cryptococcus neoformans</i>   | XP_568678            | -                 |
| TSPO_Schizosaccharomyces        | <i>Schizosaccharomyces pombe</i> | NP_595490            | -                 |
| TSPO_Neurospora                 | <i>Neurospora crassa</i>         | XP_964457            | -                 |
| <b>Archaea</b>                  |                                  |                      |                   |
| TspO_Methanoculleus             | <i>Methanoculleus marisnigri</i> | YP_001047813         | -                 |
| TspO_Methanosaeta               | <i>Methanosaeta thermophila</i>  | YP_842785            | -                 |
| <b>Bacteria</b>                 |                                  |                      |                   |
| TspO_Sphingopyxis               | <i>Sphingopyxis alaskensis</i>   | YP_615100            | -                 |
| TspO_Acidiphilium               | <i>Acidiphilium cryptum</i>      | ZP_01146325          | -                 |
| TspO_Francisella                | <i>Francisella tularensis</i>    | YP_170081            | -                 |

<sup>a</sup>TSPO1, translocator protein (18 kDa); TSPO2, TSPO-like protein; TspO, Tryptophan-Rich Sensory Protein; The letters after each abbreviation represent the name of the species from which the orthologous protein originates.

**Table S2. Oligonucleotides used in this study**

| <b>Primer</b>                | <b>Sequence*</b>                             | <b>Purpose</b>                                                      |
|------------------------------|----------------------------------------------|---------------------------------------------------------------------|
| GFP-mTSO2-R (HindIII)        | GCGA <u>AAGCTT</u> CAGCTTCAAGGACCTGTC        | GFP-mTSPO2 cloning                                                  |
| GFP-mTSO2-F (BamHI)          | GCGGGATCCCTAAGGCTGGTACGTTGGAC                | GFP-mTSPO2 cloning                                                  |
| GFP-hTSO2-R (HindIII)        | GCGA <u>AAGCTT</u> CGGCTTCAAGGGGCTATC        | GFP-hTSPO2 cloning                                                  |
| GFP-hTSO2-F (BamHI)          | GCGGGATCCCTCAGTCACTCTTCTCCGTG                | GFP-hTSPO2 cloning                                                  |
| DsRed-hTSPO2-cracR (HindIII) | GCGA <u>AAGCTT</u> CGCGGCTTCAAGGGGCTATC      | DsRed-hTSPO2-crac cloning                                           |
| DsRed-hTSPO2-cracF (BamHI)   | GCGGGATCCCTCAGAGCCAGGCTAGGTAGGGCAGC          | DsRed-hTSPO2-crac cloning                                           |
| DsRed-hTSPO2-wtR (HindIII)   | GCGA <u>AAGCTT</u> CGCGGCTTCAAGGGGCTATC      | DsRed-hTSPO2-wt cloning                                             |
| DsRed-hTSPO2-wtF (BamHI)     | GCGGGATCCCTCAGTCACTCTTCTCCGTG                | DsRed-hTSPO2-wt cloning                                             |
| mTSPO2-R(HindIII)            | GCGA <u>AAGCTT</u> AAAAATGCAGCTTCAAGGACCTG   | mTSPO2 cloning in yeast &<br>Probe for <i>in situ</i> hybridization |
| mTSPO2-F(XhoI)               | GCGCTCGAGAGGCTGGTACGTTGGACACAAGC             | mTSPO2 cloning in yeast &<br>Probe for <i>in situ</i> hybridization |
| hTSPO2-R(HindIII)            | GCGA <u>AAGCTT</u> AAAAATGCGGCTTCAAGGGGCTATC | hTSPO2 cloning in yeast                                             |
| hTSPO2-F(XhoI)               | GCGCTCGAGGTCACCTTCTCCGTGGGCTG                | hTSPO2 cloning in yeast                                             |
| mTSPO-R (HindIII)            | GCGA <u>AAGCTT</u> AAAAATGCCTGAATCCTGGGTGCC  | mTSPO1 cloning in yeast                                             |
| mTSPO-F(XhoI)                | GCGCTCGAGCTCTGGGAGCCGGGAGCC                  | mTSPO1 cloning in yeast                                             |
| mTSPO2-RnoS(NdeI)            | GCGCATATGTGTGAGGATGAGAGAAAGTTACC             | mTSPO2 cloning in <i>E. coli</i>                                    |
| mTSPO2-F*(XhoI)              | GGCCTCGAGCTAAGGCTGGTACGTTGGACACAAGC          | mTSPO2 cloning in <i>E. coli</i>                                    |
| mTSPO-cracFSp(XhoI)          | GCGCTCGAGTACAGCCAGGCCAGGTAAGGGTACAGC         | mTSPO2 cloning in <i>E. coli</i>                                    |
| mTSPO2-RT-R                  | ATTGGGCAGACCAACCTGGATCTT                     | mTSPO2 RT-PCR                                                       |
| mTSPO2-RT-F                  | ACCGACTGGATGGCTGATGAATGA                     | mTSPO2 RT-PCR                                                       |
| mTSPO1-RT-R                  | TAGCTTGACAGAAACCCTCTTGGCA                    | mTSPO1 RT-PCR                                                       |
| mTSPO1-RT-F                  | TGTGAAACCTCCCAGCTCTTTCCA                     | mTSPO1 RT-PCR                                                       |
| mTubulin-RT-R                | ACCGGCCTGTATGCTATCCAGAAA                     | mTubulin RT-PCR                                                     |
| mTubulin-RT-F                | ATTTCAATGTGAGGCGGTGGAAC                      | mTubulin RT-PCR                                                     |
| hTSPO2-RT-R                  | AGCTGGACTGTCCTGGTTCTCTTT                     | hTSPO2 RT-PCR                                                       |
| hTSPO2-RT-F                  | AACAGGCAGCCAGTTTGTGTATG                      | hTSPO2 RT-PCR                                                       |
| hTSPO1-RT-R                  | TGGGCCTCTACACTGGGCA                          | hTSPO1 RT-PCR                                                       |
| hTSPO1-RT-F                  | ACCAGCAGGAGATCCACCAA                         | hTSPO1 RT-PCR                                                       |
| hHPRT-RT-R                   | CCTGGCGTCGTGATTAGTGATGAT                     | hHPRT RT-PCR                                                        |
| hHPRT-RT-F                   | AGCAAGACGTTTCAGTCCCTGTCCAT                   | hHPRT RT-PCR                                                        |
| hTSPO2-R(NheI)               | GCGGCTAGCATGCGGCTTCAAGGGGCTATC               | hTSPO2 overexpression                                               |
| hTSPO2-F(XhoI)               | GGCCTCGAGTCACTCACTCTTCTCCGTGGGCTG            | hTSPO2 overexpression                                               |

\*Underlined characters indicate restriction enzyme sites introduced for the convenient cloning of the gene.

**Table S3. Comparison of the characteristics of TSPO1 and TSPO2.**

| <b>Properties</b>                                                                                | <b>TSPO1</b>                                                                                                                                    | <b>TSPO2</b>                                                                                                                                                                                                                                                                                                                                                                                                                                                                                                                                                                                                                                                                                                                                                                                                                                                                                                                                 |
|--------------------------------------------------------------------------------------------------|-------------------------------------------------------------------------------------------------------------------------------------------------|----------------------------------------------------------------------------------------------------------------------------------------------------------------------------------------------------------------------------------------------------------------------------------------------------------------------------------------------------------------------------------------------------------------------------------------------------------------------------------------------------------------------------------------------------------------------------------------------------------------------------------------------------------------------------------------------------------------------------------------------------------------------------------------------------------------------------------------------------------------------------------------------------------------------------------------------|
| <b>Length of predicted peptide</b>                                                               | hTSPO1, 169 aa; about 158 aa conserved core region                                                                                              | hTSPO2, 170 aa; 39-47 % identical in this 158 aa conserved region to TSPO1                                                                                                                                                                                                                                                                                                                                                                                                                                                                                                                                                                                                                                                                                                                                                                                                                                                                   |
| <b>Molecular weight/theoretical pI</b>                                                           | hTSPO2, 18.8 kDa/9.43                                                                                                                           | hTSPO2, 19.1 kDa/8.48                                                                                                                                                                                                                                                                                                                                                                                                                                                                                                                                                                                                                                                                                                                                                                                                                                                                                                                        |
| <b>Genomic location</b>                                                                          | Chromosome: 22 (human) and 15 (mouse)                                                                                                           | Chromosome: 6 (human) and 17 (mouse)                                                                                                                                                                                                                                                                                                                                                                                                                                                                                                                                                                                                                                                                                                                                                                                                                                                                                                         |
| <b>Structural signatures</b>                                                                     | Five transmembrane domains, with 10 conserved W residue (hTSPO: W5, 33, 42, 47, 68, 94, 96, 108, 144, 156).<br>hTSPO is 81% identical to mTSPO1 | Five transmembrane domains, but with only 6 conserved W residues, (hTSPO2: W38, 65, 91, 124, 141, 153). Relative to hTSPO1, the equivalents of W residues are all conserved.<br>hTSPO2 is 35% identical to hTSPO1, and 65% identical to mTSPO2.                                                                                                                                                                                                                                                                                                                                                                                                                                                                                                                                                                                                                                                                                              |
| <b>Tissue distribution</b>                                                                       | Almost every tissue in human and mouse, and likely in other organisms as well.                                                                  | Most highly expressed in:<br><b>Human</b> fetal brain (DR001979), erythroid precursor cells (BU655765, BU657409), fetus (BX282068, AI052224; AI038082; R98203).<br><b>Mouse</b> liver (BY710385) and embryo or mixed whole body (AI326916, BY080031, BY138614, BY144851, BY339509, BY343020, BY447548, AA049790, W83846).<br><b>Pig</b> pooled (CN166970, CK453370, CK452313, DN133969).<br><b>Rat</b> mixed (AW921077).<br><b>Dog</b> Mixed (DR106737).<br><b>Chicken</b> limbs (BX931454); chondrocytes (CR353324); whole embryo (BX936041, BX934347); and EST: multi-tissues (BX261561, BX277681, BX261428, BX270576, CK987275, BX270575, BX261427); liver (BU241760); whole embryo (BU200250, CD764256, BU105064, BU214674); thymus (AM064061); Chondrocytes (BU483883, BU468730, BU424969, BU433040); limbs (BU258754); MDV infected splenic T cell (AW239804); cerebrum (BU363452); Somites associated with the neural tube (CD762456) |
| <b>Ability to bind cholesterol (cholesterol recognition amino acid consensus sequence, CRAC)</b> | Yes                                                                                                                                             | Yes                                                                                                                                                                                                                                                                                                                                                                                                                                                                                                                                                                                                                                                                                                                                                                                                                                                                                                                                          |
| <b>Ability to bind benzodiazepine</b>                                                            | Yes                                                                                                                                             | -                                                                                                                                                                                                                                                                                                                                                                                                                                                                                                                                                                                                                                                                                                                                                                                                                                                                                                                                            |



|                                  |                                                                                                                                    |                                                                  |
|----------------------------------|------------------------------------------------------------------------------------------------------------------------------------|------------------------------------------------------------------|
| <b>Cellular protein complex</b>  | Mitochondrial complex: TSPO1, Star, PAP7, VDAC, etc.                                                                               | Nuclear complex: TSPO2, LBR, lamin B, LBR-specific kinase (P34). |
| <b>Phylogenetic distribution</b> | From bacteria (except some such as <i>E. coli</i> ) to all eukaryotes (except some organisms, such as yeast <i>S. cerevisiae</i> ) | Avians to mammals                                                |

**Table S4. A list of genes involved in the human TSPO1 gene network.**

| GeneID<br>A  | GeneID<br>B | GeneA          | GeneB        | Score        | PPI | Pheno<br>type | GI | Gene<br>Ontology | DDI | Micro<br>array | Gene<br>Context |
|--------------|-------------|----------------|--------------|--------------|-----|---------------|----|------------------|-----|----------------|-----------------|
| 29108        | 572         | PYCARD         | BAD          | 7.197        | -   | -             | -  | +                | -   | +              | -               |
| 26056        | 572         | RAB11FIP5      | BAD          | 8.096        | -   | -             | -  | +                | -   | +              | -               |
| 572          | 596         | BAD            | BCL2         | 7.785        | -   | -             | -  | +                | -   | +              | -               |
| 2710         | 596         | GK             | BCL2         | 8.096        | -   | -             | -  | +                | -   | +              | -               |
| 4170         | 596         | MCL1           | BCL2         | 8.14         | -   | -             | -  | +                | +   | +              | -               |
| 5894         | 596         | RAF1           | BCL2         | 8.545        | -   | -             | -  | +                | -   | +              | -               |
| 23597        | 706         | ACATE2         | <b>TSPO1</b> | 7.406        | -   | -             | -  | +                | -   | +              | -               |
| 572          | 706         | BAD            | <b>TSPO1</b> | 8.545        | -   | -             | -  | +                | -   | +              | -               |
| 596          | 706         | BCL2           | <b>TSPO1</b> | 7.785        | -   | -             | -  | +                | -   | +              | -               |
| 22918        | 706         | C1QR1          | <b>TSPO1</b> | 8.256        | -   | -             | -  | +                | -   | +              | -               |
| <b>2555</b>  | <b>706</b>  | <b>GABRA2</b>  | <b>TSPO1</b> | <b>10.12</b> | -   | -             | -  | +                | -   | +              | -               |
| 2710         | 706         | GK             | <b>TSPO1</b> | 7.975        | -   | -             | -  | +                | -   | +              | -               |
| 3267         | 706         | HRB            | <b>TSPO1</b> | 7.406        | -   | -             | -  | +                | -   | +              | -               |
| 11026        | 706         | LILRA3         | <b>TSPO1</b> | 8.256        | -   | -             | -  | +                | -   | +              | -               |
| <b>3988</b>  | <b>706</b>  | <b>LIPA</b>    | <b>TSPO1</b> | <b>7.406</b> | -   | -             | -  | +                | -   | +              | -               |
| 4170         | 706         | MCL1           | <b>TSPO1</b> | 9.16         | -   | -             | -  | +                | -   | +              | -               |
| 64747        | 706         | <i>MFSD1</i>   | <b>TSPO1</b> | 10.15        | -   | -             | -  | +                | -   | +              | -               |
| 64231        | 706         | <i>MS4A6A</i>  | <b>TSPO1</b> | 8.256        | -   | -             | -  | +                | -   | +              | -               |
| 4976         | 706         | OPA1           | <b>TSPO1</b> | 8.031        | -   | -             | -  | +                | -   | +              | -               |
| 5359         | 706         | PLSCR1         | <b>TSPO1</b> | 9.485        | -   | -             | -  | +                | -   | +              | -               |
| 5660         | 706         | PSAP           | <b>TSPO1</b> | 10.9         | -   | -             | -  | +                | -   | +              | -               |
| 5711         | 706         | PSMD5          | <b>TSPO1</b> | 7.516        | +   | -             | -  | -                | -   | +              | -               |
| 29108        | 706         | PYCARD         | <b>TSPO1</b> | 8.256        | -   | -             | -  | +                | -   | +              | -               |
| 26056        | 706         | RAB11FIP5      | <b>TSPO1</b> | 8.096        | -   | -             | -  | +                | -   | +              | -               |
| 5894         | 706         | RAF1           | <b>TSPO1</b> | 9.835        | -   | -             | -  | +                | -   | +              | -               |
| <b>5997</b>  | <b>706</b>  | <b>RGS2</b>    | <b>TSPO1</b> | <b>8.256</b> | -   | -             | -  | +                | -   | +              | -               |
| 6256         | 706         | RXRA           | <b>TSPO1</b> | 8.739        | -   | -             | -  | +                | -   | +              | -               |
| 11182        | 706         | SLC2A6         | <b>TSPO1</b> | 7.406        | -   | -             | -  | +                | -   | +              | -               |
| <b>58472</b> | <b>706</b>  | <b>SQRDL</b>   | <b>TSPO1</b> | <b>8.256</b> | -   | -             | -  | +                | -   | +              | -               |
| 10245        | 706         | <i>TIMM17B</i> | <b>TSPO1</b> | 11.02        | -   | -             | -  | +                | -   | +              | -               |
| 10469        | 706         | <i>TIMM44</i>  | <b>TSPO1</b> | 9.55         | -   | -             | -  | +                | -   | +              | -               |
| 10043        | 706         | TOM1           | <b>TSPO1</b> | 7.406        | -   | -             | -  | +                | -   | +              | -               |
| 56993        | 706         | TOMM22         | <b>TSPO1</b> | 9.894        | -   | -             | -  | +                | -   | +              | -               |
| 11026        | 22918       | LILRA3         | C1QR1        | 8.299        | -   | -             | -  | +                | +   | +              | -               |
| 706          | 834         | TSPO1          | CASP1        | 8.256        | -   | -             | -  | +                | -   | +              | -               |
| 4170         | 834         | MCL1           | CASP1        | 8.104        | -   | -             | -  | +                | -   | +              | -               |
| 64231        | 834         | <i>MS4A6A</i>  | CASP1        | 9.626        | -   | -             | -  | +                | -   | +              | -               |
| 29108        | 834         | PYCARD         | CASP1        | 17.07        | -   | -             | -  | +                | +   | +              | -               |
| 5894         | 834         | RAF1           | CASP1        | 7.948        | -   | -             | -  | +                | +   | +              | -               |
| 5997         | 834         | RGS2           | CASP1        | 11.07        | -   | -             | -  | +                | +   | +              | -               |
| 7097         | 834         | TLR2           | CASP1        | 9.626        | -   | -             | -  | +                | -   | +              | -               |
| 7305         | 834         | TYROBP         | CASP1        | 7.214        | -   | -             | -  | -                | -   | +              | -               |
| 706          | 912         | <b>TSPO1</b>   | CD1D         | 8.256        | -   | -             | -  | +                | -   | +              | -               |
| 22918        | 912         | C1QR1          | CD1D         | 8.256        | -   | -             | -  | +                | -   | +              | -               |
| 834          | 912         | CASP1          | CD1D         | 7.214        | -   | -             | -  | -                | -   | +              | -               |
| 11026        | 912         | LILRA3         | CD1D         | 9.626        | -   | -             | -  | +                | -   | +              | -               |
| 4170         | 912         | MCL1           | CD1D         | 9.162        | -   | -             | -  | +                | +   | +              | -               |
| 64231        | 912         | <i>MS4A6A</i>  | CD1D         | 9.626        | -   | -             | -  | +                | -   | +              | -               |
| 7305         | 912         | TYROBP         | CD1D         | 8.256        | -   | -             | -  | +                | -   | +              | -               |
| 706          | 9936        | <b>TSPO1</b>   | CD302        | 8.256        | -   | -             | -  | +                | -   | +              | -               |
| 22918        | 9936        | C1QR1          | CD302        | 9.656        | -   | -             | -  | +                | -   | +              | -               |
| 912          | 9936        | CD1D           | CD302        | 8.256        | -   | -             | -  | +                | -   | +              | -               |

|            |             |              |             |              |   |   |   |          |   |          |   |
|------------|-------------|--------------|-------------|--------------|---|---|---|----------|---|----------|---|
| 945        | 9936        | CD33         | CD302       | 9.656        | - | - | - | +        | - | +        | - |
| 11026      | 9936        | LILRA3       | CD302       | 8.256        | - | - | - | +        | - | +        | - |
| 64747      | 9936        | MFSD1        | CD302       | 7.214        | - | - | - | -        | - | +        | - |
| 64231      | 9936        | MS4A6A       | CD302       | 9.626        | - | - | - | +        | - | +        | - |
| 5997       | 9936        | RGS2         | CD302       | 7.214        | - | - | - | -        | - | +        | - |
| 7097       | 9936        | TLR2         | CD302       | 7.214        | - | - | - | -        | - | +        | - |
| 7305       | 9936        | TYROBP       | CD302       | 8.256        | - | - | - | +        | - | +        | - |
| 706        | 945         | <b>TSPO1</b> | CD33        | 8.256        | - | - | - | +        | - | +        | - |
| 22918      | 945         | C1QR1        | CD33        | 9.668        | - | - | - | +        | + | +        | - |
| 834        | 945         | CASP1        | CD33        | 8.59         | - | - | - | +        | + | +        | - |
| 912        | 945         | CD1D         | CD33        | 9.626        | - | - | - | +        | - | +        | - |
| 11026      | 945         | LILRA3       | CD33        | 8.256        | - | - | - | +        | - | +        | - |
| 64231      | 945         | MS4A6A       | CD33        | 9.626        | - | - | - | +        | - | +        | - |
| 29108      | 945         | PYCARD       | CD33        | 8.299        | - | - | - | +        | + | +        | - |
| 5997       | 945         | RGS2         | CD33        | 8.299        | - | - | - | +        | + | +        | - |
| 7097       | 945         | TLR2         | CD33        | 9.961        | - | - | - | +        | + | +        | - |
| 7305       | 945         | TYROBP       | CD33        | 8.256        | - | - | - | +        | - | +        | - |
| 22918      | 3267        | C1QR1        | HRB         | 9.057        | - | - | - | +        | - | +        | - |
| 11182      | 3267        | SLC2A6       | HRB         | 7.406        | - | - | - | +        | - | +        | - |
| 10043      | 3988        | TOM1         | LIPA        | 7.485        | - | - | - | +        | - | +        | - |
| 2710       | 4170        | GK           | MCL1        | 9.055        | - | - | - | +        | - | +        | - |
| 26056      | 4170        | RAB11FIP5    | MCL1        | 8.204        | - | - | - | +        | - | +        | - |
| 3267       | 64747       | HRB          | MFSD1       | 7.406        | - | - | - | +        | - | +        | - |
| 5359       | 64747       | PLSCR1       | MFSD1       | 7.214        | - | - | - | -        | - | +        | - |
| 5660       | 64747       | PSAP         | MFSD1       | 10.15        | - | - | - | +        | - | +        | - |
| 29108      | 64747       | PYCARD       | MFSD1       | 7.214        | - | - | - | -        | - | +        | - |
| 11182      | 64747       | SLC2A6       | MFSD1       | 8.739        | - | - | - | +        | - | +        | - |
| 10043      | 64747       | TOM1         | MFSD1       | 7.406        | - | - | - | +        | - | +        | - |
| 22918      | 64231       | C1QR1        | MS4A6A      | 8.256        | - | - | - | +        | - | +        | - |
| 11026      | 64231       | LILRA3       | MS4A6A      | 9.626        | - | - | - | +        | - | +        | - |
| 29108      | 64231       | PYCARD       | MS4A6A      | 9.626        | - | - | - | +        | - | +        | - |
| 5997       | 64231       | RGS2         | MS4A6A      | 9.626        | - | - | - | +        | - | +        | - |
| 706        | 8021        | <b>TSPO1</b> | NUP214      | 7.406        | - | - | - | +        | - | +        | - |
| 3267       | 8021        | HRB          | NUP214      | 9.835        | - | - | - | +        | - | +        | - |
| 64747      | 8021        | MFSD1        | NUP214      | 7.406        | - | - | - | +        | - | +        | - |
| 5660       | 8021        | PSAP         | NUP214      | 8.739        | - | - | - | +        | - | +        | - |
| 4170       | 4976        | MCL1         | OPA1        | 8.031        | - | - | - | +        | - | +        | - |
| 26056      | 4976        | RAB11FIP5    | OPA1        | 7.975        | - | - | - | +        | - | +        | - |
| 23597      | 5359        | ACATE2       | PLSCR1      | 7.406        | - | - | - | +        | - | +        | - |
| 22918      | 5359        | C1QR1        | PLSCR1      | 8.223        | - | - | - | +        | - | +        | - |
| 3988       | 5359        | LIPA         | PLSCR1      | 8.739        | - | - | - | +        | - | +        | - |
| 3988       | 5660        | LIPA         | PSAP        | 9.69         | - | - | - | +        | - | +        | - |
| 5359       | 5660        | PLSCR1       | PSAP        | 9.485        | - | - | - | +        | - | +        | - |
| 11182      | 5660        | SLC2A6       | PSAP        | 8.739        | - | - | - | +        | - | +        | - |
| 10043      | 5660        | TOM1         | PSAP        | 9.69         | - | - | - | +        | - | +        | - |
| 572        | 5894        | BAD          | RAF1        | 7.975        | - | - | - | +        | - | +        | - |
| 2710       | 5894        | GK           | RAF1        | 10.45        | - | - | - | +        | - | +        | - |
| 4170       | 5894        | MCL1         | RAF1        | 10.79        | - | - | - | +        | + | +        | - |
| 29108      | 5997        | PYCARD       | RGS2        | 9.626        | - | - | - | +        | - | +        | - |
| 5359       | 6256        | PLSCR1       | RXRA        | 7.406        | - | - | - | +        | - | +        | - |
| 5660       | 6256        | PSAP         | RXRA        | 8.797        | - | - | - | +        | + | +        | - |
| 10043      | 6256        | TOM1         | RXRA        | 7.174        | - | - | - | +        | - | +        | - |
| <b>706</b> | <b>9997</b> | <b>TSPO1</b> | <b>SCO2</b> | <b>8.256</b> | - | - | - | <b>+</b> | - | <b>+</b> | - |
|            |             |              | TIMM17      |              |   |   |   |          |   |          |   |
| 10043      | 10245       | TOM1         | B           | 7.246        | - | - | - | +        | - | +        | - |
| 10245      | 10469       | TIMM17B      | TIMM44      | 10.46        | - | - | - | +        | - | +        | - |
| 706        | 7097        | <b>TSPO1</b> | TLR2        | 8.256        | - | - | - | +        | - | +        | - |

|            |             |              |              |              |   |   |   |          |   |          |   |
|------------|-------------|--------------|--------------|--------------|---|---|---|----------|---|----------|---|
| 22918      | 7097        | C1QR1        | TLR2         | 8.057        | - | - | - | +        | - | +        | - |
| 64231      | 7097        | MS4A6A       | TLR2         | 9.626        | - | - | - | +        | - | +        | - |
| 29108      | 7097        | PYCARD       | TLR2         | 8.256        | - | - | - | +        | - | +        | - |
| 5997       | 7097        | RGS2         | TLR2         | 9.626        | - | - | - | +        | - | +        | - |
| 706        | 9804        | TSPO1        | TOMM20       | 9.894        | - | - | - | +        | - | +        | - |
| 8021       | 9804        | NUP214       | TOMM20       | 7.975        | - | - | - | +        | - | +        | - |
| 10245      | 9804        | TIMM17B      | TOMM20       | 11.75        | - | - | - | +        | - | +        | - |
| 10469      | 9804        | TIMM44       | TOMM20       | 11.02        | - | - | - | +        | - | +        | - |
| 56993      | 9804        | TOMM22       | TOMM20       | 12.63        | - | - | - | +        | - | +        | - |
| 10245      | 56993       | TIMM17B      | TOMM22       | 11.75        | - | - | - | +        | - | +        | - |
| 10469      | 56993       | TIMM44       | TOMM22       | 11.02        | - | - | - | +        | - | +        | - |
| 706        | 7305        | <b>TSPO1</b> | TYROBP       | 8.256        | - | - | - | +        | - | +        | - |
| 22918      | 7305        | C1QR1        | TYROBP       | 8.256        | - | - | - | +        | - | +        | - |
| 11026      | 7305        | LILRA3       | TYROBP       | 8.256        | - | - | - | +        | - | +        | - |
| 64231      | 7305        | MS4A6A       | TYROBP       | 9.626        | - | - | - | +        | - | +        | - |
| 5660       | 7305        | PSAP         | TYROBP       | 7.214        | - | - | - | -        | - | +        | - |
| 29108      | 7305        | PYCARD       | TYROBP       | 7.214        | - | - | - | -        | - | +        | - |
| 5894       | 7305        | RAF1         | TYROBP       | 9.835        | - | - | - | +        | - | +        | - |
| 5997       | 7305        | RGS2         | TYROBP       | 7.214        | - | - | - | -        | - | +        | - |
| 7097       | 7305        | TLR2         | TYROBP       | 7.214        | - | - | - | -        | - | +        | - |
| 572        | 7416        | BAD          | <b>VDAC1</b> | 9.95         | - | - | - | +        | - | +        | - |
| <b>706</b> | <b>7416</b> | <b>TSPO1</b> | <b>VDAC1</b> | <b>7.632</b> | - | - | - | <b>+</b> | - | <b>+</b> | - |
| 4976       | 7416        | OPA1         | <b>VDAC1</b> | 8.096        | - | - | - | +        | - | +        | - |
| 26056      | 7416        | RAB11FIP5    | <b>VDAC1</b> | 9.16         | - | - | - | +        | - | +        | - |
| 5894       | 7416        | RAF1         | <b>VDAC1</b> | 7.975        | - | - | - | +        | - | +        | - |
| 56993      | 7416        | TOMM22       | <b>VDAC1</b> | 8.739        | - | - | - | +        | - | +        | - |
| 572        | 7417        | BAD          | <b>VDAC2</b> | 9.104        | - | - | - | +        | - | +        | - |
| 706        | 7417        | TSPO1        | <b>VDAC2</b> | 7.975        | - | - | - | +        | - | +        | - |
| 4170       | 7417        | MCL1         | <b>VDAC2</b> | 7.728        | - | - | - | +        | - | +        | - |
| 4976       | 7417        | OPA1         | <b>VDAC2</b> | 9.055        | - | - | - | +        | - | +        | - |
| 26056      | 7417        | RAB11FIP5    | <b>VDAC2</b> | 8.204        | - | - | - | +        | - | +        | - |
| 5894       | 7417        | RAF1         | <b>VDAC2</b> | 8.545        | - | - | - | +        | - | +        | - |
| 7416       | 7417        | VDAC1        | <b>VDAC2</b> | 13.96        | - | - | - | +        | - | +        | - |
| 572        | 7419        | BAD          | <b>VDAC3</b> | 7.975        | - | - | - | +        | - | +        | - |
| 706        | 7419        | TSPO1        | <b>VDAC3</b> | 8.031        | - | - | - | +        | - | +        | - |
| 2710       | 7419        | GK           | <b>VDAC3</b> | 7.975        | - | - | - | +        | - | +        | - |
| 4170       | 7419        | MCL1         | <b>VDAC3</b> | 8.031        | - | - | - | +        | - | +        | - |
| 4976       | 7419        | OPA1         | <b>VDAC3</b> | 9.055        | - | - | - | +        | - | +        | - |
| 26056      | 7419        | RAB11FIP5    | <b>VDAC3</b> | 9.16         | - | - | - | +        | - | +        | - |
| 5894       | 7419        | RAF1         | <b>VDAC3</b> | 9.104        | - | - | - | +        | - | +        | - |
| 7416       | 7419        | VDAC1        | <b>VDAC3</b> | 12.63        | - | - | - | +        | - | +        | - |
| 7417       | 7419        | VDAC2        | <b>VDAC3</b> | 11.75        | - | - | - | +        | - | +        | - |

Note: PPI, protein-protein interaction; GI, Genetic interactions ; DDI, Domain-domain interaction.

**Table S5. A list of genes involved in the human TSPO2 gene network.**

| GeneID<br>A   | GeneID<br>B  | GeneA        | GeneB          | Score        | PPI | Pheno<br>type | GI | Gene<br>Ontology | DDI | Micro<br>array | Gene<br>Context |
|---------------|--------------|--------------|----------------|--------------|-----|---------------|----|------------------|-----|----------------|-----------------|
| 210           | 220972       | ALAD         | March8         | 7.214        | -   | -             | -  | -                | -   | +              | -               |
| 212           | 220972       | ALAS2        | March8         | 7.214        | -   | -             | -  | -                | -   | +              | -               |
| 2035          | 220972       | EPB41        | March8         | 7.214        | -   | -             | -  | -                | -   | +              | -               |
| 2038          | 220972       | EPB42        | March8         | 7.214        | -   | -             | -  | -                | -   | +              | -               |
| 114625        | 220972       | ERMAP        | March8         | 7.214        | -   | -             | -  | -                | -   | +              | -               |
| 10098         | 220972       | TM4SF9       | March8         | 7.214        | -   | -             | -  | -                | -   | +              | -               |
| 10107         | 220972       | TRIM10       | March8         | 9.656        | -   | -             | -  | +                | -   | +              | -               |
| 2038          | 210          | EPB42        | ALAD           | 7.214        | -   | -             | -  | -                | -   | +              | -               |
| 114625        | 210          | ERMAP        | ALAD           | 7.214        | -   | -             | -  | -                | -   | +              | -               |
| 210           | 212          | ALAD         | ALAS2          | 16.739       | -   | -             | -  | +                | -   | +              | -               |
| 1193          | 212          | CLIC2        | ALAS2          | 7.214        | -   | -             | -  | -                | -   | +              | -               |
| 2035          | 212          | EPB41        | ALAS2          | 7.549        | -   | -             | -  | -                | +   | +              | -               |
| 2038          | 212          | EPB42        | ALAS2          | 7.933        | -   | -             | -  | -                | +   | +              | -               |
| 114625        | 212          | ERMAP        | ALAS2          | 7.214        | -   | -             | -  | -                | -   | +              | -               |
| 10098         | 212          | TM4SF9       | ALAS2          | 7.214        | -   | -             | -  | -                | -   | +              | -               |
| 10107         | 212          | TRIM10       | ALAS2          | 7.214        | -   | -             | -  | -                | -   | +              | -               |
| 220972        | 66008        | March8       | ALS2CR3        | 7.214        | -   | -             | -  | -                | -   | +              | -               |
| 210           | 66008        | ALAD         | ALS2CR3        | 7.214        | -   | -             | -  | -                | -   | +              | -               |
| 212           | 66008        | ALAS2        | ALS2CR3        | 7.214        | -   | -             | -  | -                | -   | +              | -               |
| 286           | 66008        | ANK1         | ALS2CR3        | 11.027       | -   | -             | -  | +                | -   | +              | -               |
| <b>222642</b> | <b>66008</b> | <b>TSPO2</b> | <b>ALS2CR3</b> | <b>7.214</b> | -   | -             | -  | -                | -   | <b>+</b>       | -               |
| 1193          | 66008        | CLIC2        | ALS2CR3        | 7.214        | -   | -             | -  | -                | -   | +              | -               |
| 27102         | 66008        | EIF2AK1      | ALS2CR3        | 7.214        | -   | -             | -  | -                | -   | +              | -               |
| 2035          | 66008        | EPB41        | ALS2CR3        | 11.027       | -   | -             | -  | +                | -   | +              | -               |
| 2038          | 66008        | EPB42        | ALS2CR3        | 11.027       | -   | -             | -  | +                | -   | +              | -               |
| 51327         | 66008        | ERAF         | ALS2CR3        | 7.214        | -   | -             | -  | -                | -   | +              | -               |
| 114625        | 66008        | ERMAP        | ALS2CR3        | 11.004       | -   | -             | -  | +                | -   | +              | -               |
| 25793         | 66008        | FBXO7        | ALS2CR3        | 7.214        | -   | -             | -  | -                | -   | +              | -               |
| 2235          | 66008        | FECH         | ALS2CR3        | 7.214        | -   | -             | -  | -                | -   | +              | -               |
| 2993          | 66008        | GYPA         | ALS2CR3        | 11.027       | -   | -             | -  | +                | -   | +              | -               |
| 2995          | 66008        | GYPC         | ALS2CR3        | 7.214        | -   | -             | -  | -                | -   | +              | -               |
| 2996          | 66008        | GYPE         | ALS2CR3        | 7.214        | -   | -             | -  | -                | -   | +              | -               |
| 3005          | 66008        | H1F0         | ALS2CR3        | 7.214        | -   | -             | -  | -                | -   | +              | -               |
| 3049          | 66008        | HBQ1         | ALS2CR3        | 7.214        | -   | -             | -  | -                | -   | +              | -               |
| 3145          | 66008        | HMBS         | ALS2CR3        | 7.214        | -   | -             | -  | -                | -   | +              | -               |
| 4354          | 66008        | MPP1         | ALS2CR3        | 7.214        | -   | -             | -  | -                | -   | +              | -               |
| 23762         | 66008        | OSBP2        | ALS2CR3        | 7.214        | -   | -             | -  | -                | -   | +              | -               |
| 5498          | 66008        | PPOX         | ALS2CR3        | 7.214        | -   | -             | -  | -                | -   | +              | -               |
| 5886          | 66008        | RAD23A       | ALS2CR3        | 7.214        | -   | -             | -  | -                | -   | +              | -               |
| 57610         | 66008        | RANBP10      | ALS2CR3        | 7.214        | -   | -             | -  | -                | -   | +              | -               |
| 6005          | 66008        | RHAG         | ALS2CR3        | 7.214        | -   | -             | -  | -                | -   | +              | -               |
| 6006          | 66008        | RHCE         | ALS2CR3        | 7.214        | -   | -             | -  | -                | -   | +              | -               |
| 6007          | 66008        | RHD          | ALS2CR3        | 7.214        | -   | -             | -  | -                | -   | +              | -               |
| 6583          | 66008        | SLC22A4      | ALS2CR3        | 7.214        | -   | -             | -  | -                | -   | +              | -               |
| 6521          | 66008        | SLC4A1       | ALS2CR3        | 7.214        | -   | -             | -  | -                | -   | +              | -               |
| 10098         | 66008        | TM4SF9       | ALS2CR3        | 7.214        | -   | -             | -  | -                | -   | +              | -               |

|               |            |              |               |              |   |   |   |   |   |          |   |
|---------------|------------|--------------|---------------|--------------|---|---|---|---|---|----------|---|
| 10107         | 66008      | TRIM10       | ALS2CR3       | 7.021        | - | - | - | + | + | +        | - |
| 23039         | 66008      | XPO7         | ALS2CR3       | 9.626        | - | - | - | + | - | +        | - |
| 220972        | 286        | March8       | ANK1          | 7.214        | - | - | - | - | - | +        | - |
| 210           | 286        | ALAD         | ANK1          | 7.214        | - | - | - | - | - | +        | - |
| 212           | 286        | ALAS2        | ANK1          | 7.214        | - | - | - | - | - | +        | - |
| <b>222642</b> | <b>286</b> | <b>TSPO2</b> | <b>ANK1</b>   | <b>7.214</b> | - | - | - | - | - | <b>+</b> | - |
| 2035          | 286        | EPB41        | ANK1          | 12.483       | - | - | - | + | + | +        | - |
| 2038          | 286        | EPB42        | ANK1          | 12.47        | - | - | - | + | - | +        | - |
| 114625        | 286        | ERMAP        | ANK1          | 7.214        | - | - | - | - | - | +        | - |
| 25793         | 286        | FBXO7        | ANK1          | 7.214        | - | - | - | - | - | +        | - |
| 2235          | 286        | FECH         | ANK1          | 7.214        | - | - | - | - | - | +        | - |
| 23762         | 286        | OSBP2        | ANK1          | 7.214        | - | - | - | - | - | +        | - |
| 10098         | 286        | TM4SF9       | ANK1          | 7.214        | - | - | - | - | - | +        | - |
| 23039         | 286        | XPO7         | ANK1          | 7.214        | - | - | - | - | - | +        | - |
| 220972        | 665        | March8       | BNIP3L        | 7.214        | - | - | - | - | - | +        | - |
| 212           | 665        | ALAS2        | BNIP3L        | 8.057        | - | - | - | + | - | +        | - |
| 66008         | 665        | ALS2CR3      | BNIP3L        | 7.214        | - | - | - | - | - | +        | - |
| 222642        | 665        | <b>TSPO2</b> | <b>BNIP3L</b> | <b>7.214</b> | - | - | - | - | - | <b>+</b> | - |
| 27102         | 665        | EIF2AK1      | BNIP3L        | 7.214        | - | - | - | - | - | +        | - |
| 2035          | 665        | EPB41        | BNIP3L        | 7.214        | - | - | - | - | - | +        | - |
| 2038          | 665        | EPB42        | BNIP3L        | 7.214        | - | - | - | - | - | +        | - |
| 114625        | 665        | ERMAP        | BNIP3L        | 7.214        | - | - | - | - | - | +        | - |
| 25793         | 665        | FBXO7        | BNIP3L        | 7.214        | - | - | - | - | - | +        | - |
| 2235          | 665        | FECH         | BNIP3L        | 8.057        | - | - | - | + | - | +        | - |
| 2993          | 665        | GYPA         | BNIP3L        | 7.214        | - | - | - | - | - | +        | - |
| 2996          | 665        | GYPE         | BNIP3L        | 7.214        | - | - | - | - | - | +        | - |
| 3145          | 665        | HMBS         | BNIP3L        | 7.214        | - | - | - | - | - | +        | - |
| 4354          | 665        | MPP1         | BNIP3L        | 7.214        | - | - | - | - | - | +        | - |
| 4778          | 665        | NFE2         | BNIP3L        | 7.214        | - | - | - | - | - | +        | - |
| 23762         | 665        | OSBP2        | BNIP3L        | 7.214        | - | - | - | - | - | +        | - |
| 5498          | 665        | PPOX         | BNIP3L        | 8.057        | - | - | - | + | - | +        | - |
| 5886          | 665        | RAD23A       | BNIP3L        | 7.214        | - | - | - | - | - | +        | - |
| 6005          | 665        | RHAG         | BNIP3L        | 7.214        | - | - | - | - | - | +        | - |
| 6006          | 665        | RHCE         | BNIP3L        | 7.214        | - | - | - | - | - | +        | - |
| 6007          | 665        | RHD          | BNIP3L        | 7.214        | - | - | - | - | - | +        | - |
| 6583          | 665        | SLC22A4      | BNIP3L        | 8.057        | - | - | - | + | - | +        | - |
| 6521          | 665        | SLC4A1       | BNIP3L        | 7.214        | - | - | - | - | - | +        | - |
| 23039         | 665        | XPO7         | BNIP3L        | 7.214        | - | - | - | - | - | +        | - |
| 220972        | 682        | March8       | BSG           | 7.214        | - | - | - | - | - | +        | - |
| 212           | 682        | ALAS2        | BSG           | 7.549        | - | - | - | - | + | +        | - |
| <b>222642</b> | <b>682</b> | <b>TSPO2</b> | <b>BSG</b>    | <b>7.214</b> | - | - | - | - | - | <b>+</b> | - |
| 1193          | 682        | CLIC2        | BSG           | 8.256        | - | - | - | + | - | +        | - |
| 2035          | 682        | EPB41        | BSG           | 9.626        | - | - | - | + | - | +        | - |
| 2038          | 682        | EPB42        | BSG           | 7.257        | - | - | - | - | + | +        | - |
| 2235          | 682        | FECH         | BSG           | 7.214        | - | - | - | - | - | +        | - |
| 2993          | 682        | GYPA         | BSG           | 9.626        | - | - | - | + | - | +        | - |
| 3005          | 682        | H1F0         | BSG           | 7.226        | - | - | - | - | + | +        | - |
| 4354          | 682        | MPP1         | BSG           | 8.268        | - | - | - | + | + | +        | - |
| 23762         | 682        | OSBP2        | BSG           | 7.214        | - | - | - | - | - | +        | - |
| 5886          | 682        | RAD23A       | BSG           | 7.549        | - | - | - | - | + | +        | - |

|               |               |              |              |              |   |   |   |   |   |   |   |
|---------------|---------------|--------------|--------------|--------------|---|---|---|---|---|---|---|
| 6005          | 682           | RHAG         | BSG          | 9.626        | - | - | - | + | - | + | - |
| 6006          | 682           | RHCE         | BSG          | 9.626        | - | - | - | + | - | + | - |
| 6007          | 682           | RHD          | BSG          | 7.214        | - | - | - | - | - | + | - |
| 6521          | 682           | SLC4A1       | BSG          | 7.549        | - | - | - | - | + | + | - |
| 6708          | 682           | SPTA1        | BSG          | 9.626        | - | - | - | + | - | + | - |
| 23039         | 682           | XPO7         | BSG          | 7.549        | - | - | - | - | + | + | - |
| 220972        | 222642        | March8       | <b>TSPO2</b> | 7.214        | - | - | - | - | - | + | - |
| 210           | 222642        | ALAD         | <b>TSPO2</b> | 7.214        | - | - | - | - | - | + | - |
| 212           | 222642        | ALAS2        | <b>TSPO2</b> | 7.214        | - | - | - | - | - | + | - |
| 1193          | 222642        | CLIC2        | <b>TSPO2</b> | 7.214        | - | - | - | - | - | + | - |
| <b>2035</b>   | <b>222642</b> | <b>EPB41</b> | <b>TSPO2</b> | <b>7.214</b> | - | - | - | - | - | + | - |
| <b>2038</b>   | <b>222642</b> | <b>EPB42</b> | <b>TSPO2</b> | <b>7.214</b> | - | - | - | - | - | + | - |
| <b>114625</b> | <b>222642</b> | <b>ERMAP</b> | <b>TSPO2</b> | <b>7.214</b> | - | - | - | - | - | + | - |
| 10098         | 222642        | TM4SF9       | <b>TSPO2</b> | 7.214        | - | - | - | - | - | + | - |
| 10107         | 222642        | TRIM10       | <b>TSPO2</b> | 7.214        | - | - | - | - | - | + | - |
| 220972        | 760           | March8       | CA2          | 7.214        | - | - | - | - | - | + | - |
| 210           | 760           | ALAD         | CA2          | 12.322       | - | - | - | + | - | + | - |
| 212           | 760           | ALAS2        | CA2          | 7.214        | - | - | - | - | - | + | - |
| 66008         | 760           | ALS2CR3      | CA2          | 9.626        | - | - | - | + | - | + | - |
| 286           | 760           | ANK1         | CA2          | 7.214        | - | - | - | - | - | + | - |
| 222642        | 760           | <b>TSPO2</b> | CA2          | 7.214        | - | - | - | - | - | + | - |
| 2035          | 760           | EPB41        | CA2          | 9.626        | - | - | - | + | - | + | - |
| 2038          | 760           | EPB42        | CA2          | 7.214        | - | - | - | - | - | + | - |
| 51327         | 760           | ERAF         | CA2          | 7.214        | - | - | - | - | - | + | - |
| 114625        | 760           | ERMAP        | CA2          | 7.214        | - | - | - | - | - | + | - |
| 25793         | 760           | FBXO7        | CA2          | 7.214        | - | - | - | - | - | + | - |
| 2235          | 760           | FECH         | CA2          | 12.322       | - | - | - | + | - | + | - |
| 2993          | 760           | GYPA         | CA2          | 7.214        | - | - | - | - | - | + | - |
| 2995          | 760           | GYPC         | CA2          | 7.214        | - | - | - | - | - | + | - |
| 2996          | 760           | GYPE         | CA2          | 7.214        | - | - | - | - | - | + | - |
| 3005          | 760           | H1F0         | CA2          | 7.214        | - | - | - | - | - | + | - |
| 3049          | 760           | HBQ1         | CA2          | 7.214        | - | - | - | - | - | + | - |
| 3145          | 760           | HMBS         | CA2          | 7.214        | - | - | - | - | - | + | - |
| 4354          | 760           | MPP1         | CA2          | 7.214        | - | - | - | - | - | + | - |
| 23762         | 760           | OSBP2        | CA2          | 7.214        | - | - | - | - | - | + | - |
| 5498          | 760           | PPOX         | CA2          | 7.214        | - | - | - | - | - | + | - |
| 57610         | 760           | RANBP10      | CA2          | 7.214        | - | - | - | - | - | + | - |
| 6005          | 760           | RHAG         | CA2          | 7.214        | - | - | - | - | - | + | - |
| 6006          | 760           | RHCE         | CA2          | 7.214        | - | - | - | - | - | + | - |
| 6007          | 760           | RHD          | CA2          | 7.214        | - | - | - | - | - | + | - |
| 6583          | 760           | SLC22A4      | CA2          | 7.214        | - | - | - | - | - | + | - |
| 6521          | 760           | SLC4A1       | CA2          | 7.214        | - | - | - | - | - | + | - |
| 6708          | 760           | SPTA1        | CA2          | 7.214        | - | - | - | - | - | + | - |
| 10098         | 760           | TM4SF9       | CA2          | 7.214        | - | - | - | - | - | + | - |
| 10107         | 760           | TRIM10       | CA2          | 9.633        | - | - | - | + | - | + | - |
| 23039         | 760           | XPO7         | CA2          | 9.626        | - | - | - | + | - | + | - |
| 222642        | 63893         | <b>TSPO2</b> | E2-230K      | 7.214        | - | - | - | - | - | + | - |
| 2035          | 63893         | EPB41        | E2-230K      | 7.214        | - | - | - | - | - | + | - |
| 25793         | 63893         | FBXO7        | E2-230K      | 9.656        | - | - | - | + | - | + | - |
| 23039         | 63893         | XPO7         | E2-230K      | 7.214        | - | - | - | - | - | + | - |

|               |              |              |             |              |   |   |   |   |   |   |   |
|---------------|--------------|--------------|-------------|--------------|---|---|---|---|---|---|---|
| 220972        | 27102        | March8       | EIF2AK1     | 7.214        | - | - | - | - | - | + | - |
| 212           | 27102        | ALAS2        | EIF2AK1     | 8.057        | - | - | - | + | - | + | - |
| 222642        | 27102        | <b>TSPO2</b> | EIF2AK1     | 7.214        | - | - | - | - | - | + | - |
| 2038          | 27102        | EPB42        | EIF2AK1     | 7.214        | - | - | - | - | - | + | - |
| 25793         | 27102        | FBXO7        | EIF2AK1     | 7.214        | - | - | - | - | - | + | - |
| 2235          | 27102        | FECH         | EIF2AK1     | 7.214        | - | - | - | - | - | + | - |
| 23039         | 27102        | XPO7         | EIF2AK1     | 7.214        | - | - | - | - | - | + | - |
| 1193          | 2035         | CLIC2        | EPB41       | 9.626        | - | - | - | + | - | + | - |
| 114625        | 2035         | ERMAP        | EPB41       | 7.214        | - | - | - | - | - | + | - |
| 10098         | 2035         | TM4SF9       | EPB41       | 7.214        | - | - | - | - | - | + | - |
| 10107         | 2035         | TRIM10       | EPB41       | 8.057        | - | - | - | + | - | + | - |
| 1193          | 2038         | CLIC2        | EPB42       | 7.214        | - | - | - | - | - | + | - |
| 2035          | 2038         | EPB41        | EPB42       | 13.189       | - | - | - | + | + | + | - |
| 114625        | 2038         | ERMAP        | EPB42       | 7.214        | - | - | - | - | - | + | - |
| 10098         | 2038         | TM4SF9       | EPB42       | 7.214        | - | - | - | - | - | + | - |
| 10107         | 2038         | TRIM10       | EPB42       | 7.214        | - | - | - | - | - | + | - |
| 220972        | 51327        | March8       | ERAF        | 7.214        | - | - | - | - | - | + | - |
| 210           | 51327        | ALAD         | ERAF        | 7.214        | - | - | - | - | - | + | - |
| 212           | 51327        | ALAS2        | ERAF        | 7.214        | - | - | - | - | - | + | - |
| 286           | 51327        | ANK1         | ERAF        | 7.214        | - | - | - | - | - | + | - |
| <b>222642</b> | <b>51327</b> | <b>TSPO2</b> | <b>ERAF</b> | <b>7.214</b> | - | - | - | - | - | + | - |
| 2038          | 51327        | EPB42        | ERAF        | 7.214        | - | - | - | - | - | + | - |
| 114625        | 51327        | ERMAP        | ERAF        | 7.214        | - | - | - | - | - | + | - |
| 25793         | 51327        | FBXO7        | ERAF        | 7.214        | - | - | - | - | - | + | - |
| 2235          | 51327        | FECH         | ERAF        | 7.214        | - | - | - | - | - | + | - |
| 2993          | 51327        | GYPA         | ERAF        | 7.214        | - | - | - | - | - | + | - |
| 2995          | 51327        | GYPC         | ERAF        | 7.214        | - | - | - | - | - | + | - |
| 2996          | 51327        | GYPE         | ERAF        | 7.214        | - | - | - | - | - | + | - |
| 3005          | 51327        | H1F0         | ERAF        | 7.214        | - | - | - | - | - | + | - |
| 3049          | 51327        | HBQ1         | ERAF        | 16.739       | - | - | - | + | - | + | - |
| 3145          | 51327        | HMBS         | ERAF        | 7.214        | - | - | - | - | - | + | - |
| 51312         | 51327        | MSCP         | ERAF        | 7.214        | - | - | - | - | - | + | - |
| 23762         | 51327        | OSBP2        | ERAF        | 7.214        | - | - | - | - | - | + | - |
| 10107         | 51327        | TRIM10       | ERAF        | 13.45        | - | - | - | + | - | + | - |
| 10098         | 114625       | TM4SF9       | ERMAP       | 7.214        | - | - | - | - | - | + | - |
| 220972        | 25793        | March8       | FBXO7       | 11.027       | - | - | - | + | - | + | - |
| 210           | 25793        | ALAD         | FBXO7       | 7.214        | - | - | - | - | - | + | - |
| 212           | 25793        | ALAS2        | FBXO7       | 7.214        | - | - | - | - | - | + | - |
| 222642        | 25793        | <b>TSPO2</b> | FBXO7       | 7.214        | - | - | - | - | - | + | - |
| 2038          | 25793        | EPB42        | FBXO7       | 7.214        | - | - | - | - | - | + | - |
| 114625        | 25793        | ERMAP        | FBXO7       | 7.214        | - | - | - | - | - | + | - |
| 2235          | 25793        | FECH         | FBXO7       | 7.214        | - | - | - | - | - | + | - |
| 23762         | 25793        | OSBP2        | FBXO7       | 7.214        | - | - | - | - | - | + | - |
| 10107         | 25793        | TRIM10       | FBXO7       | 9.7          | - | - | - | + | + | + | - |
| 23039         | 25793        | XPO7         | FBXO7       | 7.214        | - | - | - | - | - | + | - |
| 220972        | 2235         | March8       | FECH        | 7.214        | - | - | - | - | - | + | - |
| 210           | 2235         | ALAD         | FECH        | 16.739       | - | - | - | + | - | + | - |
| 212           | 2235         | ALAS2        | FECH        | 16.739       | - | - | - | + | - | + | - |
| 222642        | 2235         | <b>TSPO2</b> | FECH        | 7.214        | - | - | - | - | - | + | - |
| 1193          | 2235         | CLIC2        | FECH        | 7.214        | - | - | - | - | - | + | - |



|               |             |              |             |              |   |   |   |   |   |          |   |
|---------------|-------------|--------------|-------------|--------------|---|---|---|---|---|----------|---|
| 2035          | 2235        | EPB41        | FECH        | 7.214        | - | - | - | - | - | +        | - |
| 2038          | 2235        | EPB42        | FECH        | 7.214        | - | - | - | - | - | +        | - |
| 114625        | 2235        | ERMAP        | FECH        | 7.214        | - | - | - | - | - | +        | - |
| 10098         | 2235        | TM4SF9       | FECH        | 7.214        | - | - | - | - | - | +        | - |
| 10107         | 2235        | TRIM10       | FECH        | 7.214        | - | - | - | - | - | +        | - |
| 220972        | 2993        | March8       | GYPA        | 7.214        | - | - | - | - | - | +        | - |
| 210           | 2993        | ALAD         | GYPA        | 7.214        | - | - | - | - | - | +        | - |
| 212           | 2993        | ALAS2        | GYPA        | 7.214        | - | - | - | - | - | +        | - |
| 286           | 2993        | ANK1         | GYPA        | 11.027       | - | - | - | + | - | +        | - |
| <b>222642</b> | <b>2993</b> | <b>TSPO2</b> | <b>GYPA</b> | <b>7.214</b> | - | - | - | - | - | <b>+</b> | - |
| 1193          | 2993        | CLIC2        | GYPA        | 11.027       | - | - | - | + | - | +        | - |
| 27102         | 2993        | EIF2AK1      | GYPA        | 7.214        | - | - | - | - | - | +        | - |
| 2035          | 2993        | EPB41        | GYPA        | 11.027       | - | - | - | + | - | +        | - |
| 2038          | 2993        | EPB42        | GYPA        | 11.027       | - | - | - | + | - | +        | - |
| 114625        | 2993        | ERMAP        | GYPA        | 7.214        | - | - | - | - | - | +        | - |
| 25793         | 2993        | FBXO7        | GYPA        | 7.214        | - | - | - | - | - | +        | - |
| 2235          | 2993        | FECH         | GYPA        | 7.214        | - | - | - | - | - | +        | - |
| 23762         | 2993        | OSBP2        | GYPA        | 7.214        | - | - | - | - | - | +        | - |
| 10098         | 2993        | TM4SF9       | GYPA        | 7.214        | - | - | - | - | - | +        | - |
| 10107         | 2993        | TRIM10       | GYPA        | 7.214        | - | - | - | - | - | +        | - |
| 23039         | 2993        | XPO7         | GYPA        | 7.214        | - | - | - | - | - | +        | - |
| 220972        | 2995        | March8       | GYPC        | 7.214        | - | - | - | - | - | +        | - |
| 210           | 2995        | ALAD         | GYPC        | 7.214        | - | - | - | - | - | +        | - |
| 212           | 2995        | ALAS2        | GYPC        | 7.214        | - | - | - | - | - | +        | - |
| 286           | 2995        | ANK1         | GYPC        | 7.214        | - | - | - | - | - | +        | - |
| <b>222642</b> | <b>2995</b> | <b>TSPO2</b> | <b>GYPC</b> | <b>7.214</b> | - | - | - | - | - | <b>+</b> | - |
| 2038          | 2995        | EPB42        | GYPC        | 7.214        | - | - | - | - | - | +        | - |
| 114625        | 2995        | ERMAP        | GYPC        | 7.214        | - | - | - | - | - | +        | - |
| 25793         | 2995        | FBXO7        | GYPC        | 7.214        | - | - | - | - | - | +        | - |
| 2235          | 2995        | FECH         | GYPC        | 7.214        | - | - | - | - | - | +        | - |
| 2993          | 2995        | GYPA         | GYPC        | 7.214        | - | - | - | - | - | +        | - |
| 23039         | 2995        | XPO7         | GYPC        | 7.214        | - | - | - | - | - | +        | - |
| 220972        | 2996        | March8       | GYPE        | 7.214        | - | - | - | - | - | +        | - |
| 210           | 2996        | ALAD         | GYPE        | 7.214        | - | - | - | - | - | +        | - |
| 212           | 2996        | ALAS2        | GYPE        | 7.214        | - | - | - | - | - | +        | - |
| 286           | 2996        | ANK1         | GYPE        | 7.214        | - | - | - | - | - | +        | - |
| 222642        | 2996        | <b>TSPO2</b> | GYPE        | 7.214        | - | - | - | - | - | +        | - |
| 1193          | 2996        | CLIC2        | GYPE        | 7.214        | - | - | - | - | - | +        | - |
| 2035          | 2996        | EPB41        | GYPE        | 7.214        | - | - | - | - | - | +        | - |
| 2038          | 2996        | EPB42        | GYPE        | 7.214        | - | - | - | - | - | +        | - |
| 114625        | 2996        | ERMAP        | GYPE        | 7.214        | - | - | - | - | - | +        | - |
| 25793         | 2996        | FBXO7        | GYPE        | 7.214        | - | - | - | - | - | +        | - |
| 2235          | 2996        | FECH         | GYPE        | 7.214        | - | - | - | - | - | +        | - |
| 2993          | 2996        | GYPA         | GYPE        | 7.214        | - | - | - | - | - | +        | - |
| 2995          | 2996        | GYPC         | GYPE        | 9.626        | - | - | - | + | - | +        | - |
| 23762         | 2996        | OSBP2        | GYPE        | 7.214        | - | - | - | - | - | +        | - |
| 10098         | 2996        | TM4SF9       | GYPE        | 7.214        | - | - | - | - | - | +        | - |
| 10107         | 2996        | TRIM10       | GYPE        | 7.214        | - | - | - | - | - | +        | - |
| 23039         | 2996        | XPO7         | GYPE        | 7.214        | - | - | - | - | - | +        | - |
| 220972        | 3005        | March8       | H1F0        | 7.214        | - | - | - | - | - | +        | - |

|               |             |              |             |              |   |   |   |   |   |   |   |
|---------------|-------------|--------------|-------------|--------------|---|---|---|---|---|---|---|
| 212           | 3005        | ALAS2        | H1F0        | 7.214        | - | - | - | - | - | + | - |
| 286           | 3005        | ANK1         | H1F0        | 7.272        | - | - | - | - | + | + | - |
| 222642        | 3005        | <b>TSPO2</b> | H1F0        | 7.214        | - | - | - | - | - | + | - |
| 2035          | 3005        | EPB41        | H1F0        | 7.272        | - | - | - | - | + | + | - |
| 2038          | 3005        | EPB42        | H1F0        | 7.214        | - | - | - | - | - | + | - |
| 114625        | 3005        | ERMAP        | H1F0        | 7.214        | - | - | - | - | - | + | - |
| 25793         | 3005        | FBXO7        | H1F0        | 7.214        | - | - | - | - | - | + | - |
| 2235          | 3005        | FECH         | H1F0        | 7.214        | - | - | - | - | - | + | - |
| 2993          | 3005        | GYPA         | H1F0        | 7.214        | - | - | - | - | - | + | - |
| 2995          | 3005        | GYPC         | H1F0        | 7.214        | - | - | - | - | - | + | - |
| 2996          | 3005        | GYPE         | H1F0        | 7.214        | - | - | - | - | - | + | - |
| 23762         | 3005        | OSBP2        | H1F0        | 7.214        | - | - | - | - | - | + | - |
| 10098         | 3005        | TM4SF9       | H1F0        | 7.214        | - | - | - | - | - | + | - |
| 23039         | 3005        | XPO7         | H1F0        | 7.214        | - | - | - | - | - | + | - |
| 220972        | 3049        | March8       | HBQ1        | 7.214        | - | - | - | - | - | + | - |
| 210           | 3049        | ALAD         | HBQ1        | 7.214        | - | - | - | - | - | + | - |
| 212           | 3049        | ALAS2        | HBQ1        | 7.214        | - | - | - | - | - | + | - |
| 286           | 3049        | ANK1         | HBQ1        | 7.214        | - | - | - | - | - | + | - |
| <b>222642</b> | <b>3049</b> | <b>TSPO2</b> | <b>HBQ1</b> | <b>7.214</b> | - | - | - | - | - | + | - |
| 27102         | 3049        | EIF2AK1      | HBQ1        | 13.45        | - | - | - | + | - | + | - |
| 2035          | 3049        | EPB41        | HBQ1        | 7.214        | - | - | - | - | - | + | - |
| 2038          | 3049        | EPB42        | HBQ1        | 7.214        | - | - | - | - | - | + | - |
| 114625        | 3049        | ERMAP        | HBQ1        | 7.214        | - | - | - | - | - | + | - |
| 25793         | 3049        | FBXO7        | HBQ1        | 7.214        | - | - | - | - | - | + | - |
| 2235          | 3049        | FECH         | HBQ1        | 7.214        | - | - | - | - | - | + | - |
| 2993          | 3049        | GYPA         | HBQ1        | 7.214        | - | - | - | - | - | + | - |
| 2995          | 3049        | GYPC         | HBQ1        | 7.214        | - | - | - | - | - | + | - |
| 2996          | 3049        | GYPE         | HBQ1        | 7.214        | - | - | - | - | - | + | - |
| 3005          | 3049        | H1F0         | HBQ1        | 7.214        | - | - | - | - | - | + | - |
| 23762         | 3049        | OSBP2        | HBQ1        | 8.057        | - | - | - | + | - | + | - |
| 10098         | 3049        | TM4SF9       | HBQ1        | 7.214        | - | - | - | - | - | + | - |
| 23039         | 3049        | XPO7         | HBQ1        | 8.057        | - | - | - | + | - | + | - |
| 220972        | 8364        | March8       | HIST1H4C    | 7.214        | - | - | - | - | - | + | - |
| 212           | 8364        | ALAS2        | HIST1H4C    | 7.214        | - | - | - | - | - | + | - |
| 66008         | 8364        | ALS2CR3      | HIST1H4C    | 7.83         | - | - | - | - | + | + | - |
| 286           | 8364        | ANK1         | HIST1H4C    | 7.214        | - | - | - | - | - | + | - |
| 665           | 8364        | BNIP3L       | HIST1H4C    | 7.214        | - | - | - | - | - | + | - |
| 222642        | 8364        | <b>TSPO2</b> | HIST1H4C    | 7.214        | - | - | - | - | - | + | - |
| 760           | 8364        | CA2          | HIST1H4C    | 7.214        | - | - | - | - | - | + | - |
| 2035          | 8364        | EPB41        | HIST1H4C    | 7.214        | - | - | - | - | - | + | - |
| 2038          | 8364        | EPB42        | HIST1H4C    | 7.214        | - | - | - | - | - | + | - |
| 114625        | 8364        | ERMAP        | HIST1H4C    | 7.214        | - | - | - | - | - | + | - |
| 25793         | 8364        | FBXO7        | HIST1H4C    | 7.214        | - | - | - | - | - | + | - |
| 2235          | 8364        | FECH         | HIST1H4C    | 7.214        | - | - | - | - | - | + | - |
| 2993          | 8364        | GYPA         | HIST1H4C    | 7.214        | - | - | - | - | - | + | - |
| 2996          | 8364        | GYPE         | HIST1H4C    | 7.214        | - | - | - | - | - | + | - |
| 3005          | 8364        | H1F0         | HIST1H4C    | 7.214        | - | - | - | - | - | + | - |
| 3049          | 8364        | HBQ1         | HIST1H4C    | 7.214        | - | - | - | - | - | + | - |
| 3145          | 8364        | HMBS         | HIST1H4C    | 7.214        | - | - | - | - | - | + | - |
| 23762         | 8364        | OSBP2        | HIST1H4C    | 7.214        | - | - | - | - | - | + | - |

|        |       |              |          |        |   |   |   |   |   |   |   |
|--------|-------|--------------|----------|--------|---|---|---|---|---|---|---|
| 5498   | 8364  | PPOX         | HIST1H4C | 7.214  | - | - | - | - | - | + | - |
| 5886   | 8364  | RAD23A       | HIST1H4C | 7.214  | - | - | - | - | - | + | - |
| 57610  | 8364  | RANBP10      | HIST1H4C | 7.214  | - | - | - | - | - | + | - |
| 6005   | 8364  | RHAG         | HIST1H4C | 7.214  | - | - | - | - | - | + | - |
| 6006   | 8364  | RHCE         | HIST1H4C | 7.214  | - | - | - | - | - | + | - |
| 6007   | 8364  | RHD          | HIST1H4C | 7.214  | - | - | - | - | - | + | - |
| 6583   | 8364  | SLC22A4      | HIST1H4C | 7.214  | - | - | - | - | - | + | - |
| 6521   | 8364  | SLC4A1       | HIST1H4C | 7.214  | - | - | - | - | - | + | - |
| 6708   | 8364  | SPTA1        | HIST1H4C | 7.83   | - | - | - | - | + | + | - |
| 10098  | 8364  | TM4SF9       | HIST1H4C | 7.214  | - | - | - | - | - | + | - |
| 23039  | 8364  | XPO7         | HIST1H4C | 7.214  | - | - | - | - | - | + | - |
| 220972 | 3145  | March8       | HMBS     | 7.214  | - | - | - | - | - | + | - |
| 210    | 3145  | ALAD         | HMBS     | 21.324 | - | - | - | + | - | + | + |
| 212    | 3145  | ALAS2        | HMBS     | 16.739 | - | - | - | + | - | + | - |
| 286    | 3145  | ANK1         | HMBS     | 7.214  | - | - | - | - | - | + | - |
| 222642 | 3145  | <b>TSPO2</b> | HMBS     | 7.214  | - | - | - | - | - | + | - |
| 1193   | 3145  | CLIC2        | HMBS     | 7.214  | - | - | - | - | - | + | - |
| 27102  | 3145  | EIF2AK1      | HMBS     | 9.626  | - | - | - | + | - | + | - |
| 2035   | 3145  | EPB41        | HMBS     | 7.214  | - | - | - | - | - | + | - |
| 2038   | 3145  | EPB42        | HMBS     | 7.214  | - | - | - | - | - | + | - |
| 114625 | 3145  | ERMAP        | HMBS     | 7.214  | - | - | - | - | - | + | - |
| 25793  | 3145  | FBXO7        | HMBS     | 7.214  | - | - | - | - | - | + | - |
| 2235   | 3145  | FECH         | HMBS     | 16.739 | - | - | - | + | - | + | - |
| 2993   | 3145  | GYPA         | HMBS     | 7.214  | - | - | - | - | - | + | - |
| 2995   | 3145  | GYPC         | HMBS     | 7.214  | - | - | - | - | - | + | - |
| 2996   | 3145  | GYPE         | HMBS     | 7.214  | - | - | - | - | - | + | - |
| 3005   | 3145  | H1F0         | HMBS     | 7.214  | - | - | - | - | - | + | - |
| 3049   | 3145  | HBQ1         | HMBS     | 7.214  | - | - | - | - | - | + | - |
| 23762  | 3145  | OSBP2        | HMBS     | 7.214  | - | - | - | - | - | + | - |
| 10098  | 3145  | TM4SF9       | HMBS     | 7.214  | - | - | - | - | - | + | - |
| 23039  | 3145  | XPO7         | HMBS     | 7.214  | - | - | - | - | - | + | - |
| 220972 | 4354  | March8       | MPP1     | 7.214  | - | - | - | - | - | + | - |
| 212    | 4354  | ALAS2        | MPP1     | 7.549  | - | - | - | - | + | + | - |
| 286    | 4354  | ANK1         | MPP1     | 10.345 | - | - | - | + | + | + | - |
| 222642 | 4354  | <b>TSPO2</b> | MPP1     | 7.214  | - | - | - | - | - | + | - |
| 1193   | 4354  | CLIC2        | MPP1     | 9.656  | - | - | - | + | - | + | - |
| 27102  | 4354  | EIF2AK1      | MPP1     | 7.214  | - | - | - | - | - | + | - |
| 2035   | 4354  | EPB41        | MPP1     | 8.59   | - | - | - | + | + | + | - |
| 2038   | 4354  | EPB42        | MPP1     | 7.549  | - | - | - | - | + | + | - |
| 114625 | 4354  | ERMAP        | MPP1     | 7.214  | - | - | - | - | - | + | - |
| 25793  | 4354  | FBXO7        | MPP1     | 7.214  | - | - | - | - | - | + | - |
| 2235   | 4354  | FECH         | MPP1     | 7.214  | - | - | - | - | - | + | - |
| 2993   | 4354  | GYPA         | MPP1     | 11.027 | - | - | - | + | - | + | - |
| 2995   | 4354  | GYPC         | MPP1     | 9.626  | - | - | - | + | - | + | - |
| 2996   | 4354  | GYPE         | MPP1     | 8.256  | - | - | - | + | - | + | - |
| 3049   | 4354  | HBQ1         | MPP1     | 7.214  | - | - | - | - | - | + | - |
| 3145   | 4354  | HMBS         | MPP1     | 7.214  | - | - | - | - | - | + | - |
| 23039  | 4354  | XPO7         | MPP1     | 7.549  | - | - | - | - | + | + | - |
| 220972 | 51312 | March8       | MSCP     | 7.214  | - | - | - | - | - | + | - |
| 212    | 51312 | ALAS2        | MSCP     | 9.626  | - | - | - | + | - | + | - |

|               |              |              |              |              |   |   |   |   |   |          |   |
|---------------|--------------|--------------|--------------|--------------|---|---|---|---|---|----------|---|
| 222642        | 51312        | TSPO2        | MSCP         | 7.214        | - | - | - | - | - | +        | - |
| 2035          | 51312        | EPB41        | MSCP         | 10.951       | - | - | - | + | - | +        | - |
| 2038          | 51312        | EPB42        | MSCP         | 7.214        | - | - | - | - | - | +        | - |
| 25793         | 51312        | FBX07        | MSCP         | 7.214        | - | - | - | - | - | +        | - |
| 2235          | 51312        | FECH         | MSCP         | 12.322       | - | - | - | + | - | +        | - |
| 2993          | 51312        | GYPA         | MSCP         | 7.214        | - | - | - | - | - | +        | - |
| 2995          | 51312        | GYPC         | MSCP         | 7.214        | - | - | - | - | - | +        | - |
| 3049          | 51312        | HBQ1         | MSCP         | 8.256        | - | - | - | + | - | +        | - |
| 3145          | 51312        | HMBS         | MSCP         | 7.214        | - | - | - | - | - | +        | - |
| 4354          | 51312        | MPP1         | MSCP         | 7.214        | - | - | - | - | - | +        | - |
| 23039         | 51312        | XPO7         | MSCP         | 10.149       | - | - | - | + | - | +        | - |
| 220972        | 4778         | March8       | NFE2         | 7.214        | - | - | - | - | - | +        | - |
| 212           | 4778         | ALAS2        | NFE2         | 7.214        | - | - | - | - | - | +        | - |
| <b>222642</b> | <b>4778</b>  | <b>TSPO2</b> | <b>NFE2</b>  | <b>7.214</b> | - | - | - | - | - | <b>+</b> | - |
| 2035          | 4778         | EPB41        | NFE2         | 13.45        | - | - | - | + | - | +        | - |
| 2038          | 4778         | EPB42        | NFE2         | 7.549        | - | - | - | - | + | +        | - |
| 114625        | 4778         | ERMAP        | NFE2         | 7.214        | - | - | - | - | - | +        | - |
| 2235          | 4778         | FECH         | NFE2         | 7.214        | - | - | - | - | - | +        | - |
| 2993          | 4778         | GYPA         | NFE2         | 7.214        | - | - | - | - | - | +        | - |
| 3145          | 4778         | HMBS         | NFE2         | 7.214        | - | - | - | - | - | +        | - |
| 4354          | 4778         | MPP1         | NFE2         | 7.933        | - | - | - | - | + | +        | - |
| 23039         | 4778         | XPO7         | NFE2         | 7.214        | - | - | - | - | - | +        | - |
| 220972        | 23762        | March8       | OSBP2        | 7.214        | - | - | - | - | - | +        | - |
| 212           | 23762        | ALAS2        | OSBP2        | 7.214        | - | - | - | - | - | +        | - |
| <b>222642</b> | <b>23762</b> | <b>TSPO2</b> | <b>OSBP2</b> | <b>7.214</b> | - | - | - | - | - | <b>+</b> | - |
| 1193          | 23762        | CLIC2        | OSBP2        | 7.214        | - | - | - | - | - | +        | - |
| 2035          | 23762        | EPB41        | OSBP2        | 7.549        | - | - | - | - | + | +        | - |
| 2038          | 23762        | EPB42        | OSBP2        | 7.933        | - | - | - | - | + | +        | - |
| 114625        | 23762        | ERMAP        | OSBP2        | 8.057        | - | - | - | + | - | +        | - |
| 2235          | 23762        | FECH         | OSBP2        | 7.214        | - | - | - | - | - | +        | - |
| 10098         | 23762        | TM4SF9       | OSBP2        | 7.214        | - | - | - | - | - | +        | - |
| 10107         | 23762        | TRIM10       | OSBP2        | 7.549        | - | - | - | - | + | +        | - |
| 23039         | 23762        | XPO7         | OSBP2        | 8.057        | - | - | - | + | - | +        | - |
| 220972        | 5498         | March8       | PPOX         | 7.214        | - | - | - | - | - | +        | - |
| 210           | 5498         | ALAD         | PPOX         | 16.739       | - | - | - | + | - | +        | - |
| 212           | 5498         | ALAS2        | PPOX         | 16.739       | - | - | - | + | - | +        | - |
| 286           | 5498         | ANK1         | PPOX         | 7.214        | - | - | - | - | - | +        | - |
| 222642        | 5498         | <b>TSPO2</b> | PPOX         | 7.214        | - | - | - | - | - | +        | - |
| 1193          | 5498         | CLIC2        | PPOX         | 7.214        | - | - | - | - | - | +        | - |
| 27102         | 5498         | EIF2AK1      | PPOX         | 7.214        | - | - | - | - | - | +        | - |
| 2035          | 5498         | EPB41        | PPOX         | 7.214        | - | - | - | - | - | +        | - |
| 2038          | 5498         | EPB42        | PPOX         | 7.214        | - | - | - | - | - | +        | - |
| 51327         | 5498         | ERAF         | PPOX         | 7.214        | - | - | - | - | - | +        | - |
| 114625        | 5498         | ERMAP        | PPOX         | 7.214        | - | - | - | - | - | +        | - |
| 25793         | 5498         | FBX07        | PPOX         | 7.214        | - | - | - | - | - | +        | - |
| 2235          | 5498         | FECH         | PPOX         | 21.275       | - | - | - | + | - | +        | + |
| 2993          | 5498         | GYPA         | PPOX         | 7.214        | - | - | - | - | - | +        | - |
| 2995          | 5498         | GYPC         | PPOX         | 7.214        | - | - | - | - | - | +        | - |
| 2996          | 5498         | GYPE         | PPOX         | 7.214        | - | - | - | - | - | +        | - |
| 3005          | 5498         | H1F0         | PPOX         | 7.214        | - | - | - | - | - | +        | - |

|        |       |              |         |        |   |   |   |   |   |   |   |
|--------|-------|--------------|---------|--------|---|---|---|---|---|---|---|
| 3049   | 5498  | HBQ1         | PPOX    | 7.214  | - | - | - | - | - | + | - |
| 3145   | 5498  | HMBS         | PPOX    | 16.739 | - | - | - | + | - | + | - |
| 4354   | 5498  | MPP1         | PPOX    | 7.214  | - | - | - | - | - | + | - |
| 51312  | 5498  | MSCP         | PPOX    | 9.626  | - | - | - | + | - | + | - |
| 4778   | 5498  | NFE2         | PPOX    | 7.214  | - | - | - | - | - | + | - |
| 23762  | 5498  | OSBP2        | PPOX    | 7.214  | - | - | - | - | - | + | - |
| 10098  | 5498  | TM4SF9       | PPOX    | 7.214  | - | - | - | - | - | + | - |
| 23039  | 5498  | XPO7         | PPOX    | 7.214  | - | - | - | - | - | + | - |
| 220972 | 5886  | March8       | RAD23A  | 7.214  | - | - | - | - | - | + | - |
| 212    | 5886  | ALAS2        | RAD23A  | 7.214  | - | - | - | - | - | + | - |
| 286    | 5886  | ANK1         | RAD23A  | 7.549  | - | - | - | - | + | + | - |
| 222642 | 5886  | <b>TSPO2</b> | RAD23A  | 7.214  | - | - | - | - | - | + | - |
| 27102  | 5886  | EIF2AK1      | RAD23A  | 7.214  | - | - | - | - | - | + | - |
| 2035   | 5886  | EPB41        | RAD23A  | 7.549  | - | - | - | - | + | + | - |
| 2038   | 5886  | EPB42        | RAD23A  | 7.214  | - | - | - | - | - | + | - |
| 25793  | 5886  | FBXO7        | RAD23A  | 7.933  | - | - | - | - | + | + | - |
| 2235   | 5886  | FECH         | RAD23A  | 7.214  | - | - | - | - | - | + | - |
| 2993   | 5886  | GYPA         | RAD23A  | 7.214  | - | - | - | - | - | + | - |
| 3145   | 5886  | HMBS         | RAD23A  | 7.214  | - | - | - | - | - | + | - |
| 23762  | 5886  | OSBP2        | RAD23A  | 7.83   | - | - | - | - | + | + | - |
| 5498   | 5886  | PPOX         | RAD23A  | 7.214  | - | - | - | - | - | + | - |
| 57610  | 5886  | RANBP10      | RAD23A  | 7.214  | - | - | - | - | - | + | - |
| 23039  | 5886  | XPO7         | RAD23A  | 7.214  | - | - | - | - | - | + | - |
| 220972 | 57610 | March8       | RANBP10 | 7.214  | - | - | - | - | - | + | - |
| 212    | 57610 | ALAS2        | RANBP10 | 7.214  | - | - | - | - | - | + | - |
| 286    | 57610 | ANK1         | RANBP10 | 7.214  | - | - | - | - | - | + | - |
| 222642 | 57610 | <b>TSPO2</b> | RANBP10 | 7.214  | - | - | - | - | - | + | - |
| 2035   | 57610 | EPB41        | RANBP10 | 7.214  | - | - | - | - | - | + | - |
| 2038   | 57610 | EPB42        | RANBP10 | 7.214  | - | - | - | - | - | + | - |
| 114625 | 57610 | ERMAP        | RANBP10 | 7.214  | - | - | - | - | - | + | - |
| 25793  | 57610 | FBXO7        | RANBP10 | 7.214  | - | - | - | - | - | + | - |
| 2235   | 57610 | FECH         | RANBP10 | 7.214  | - | - | - | - | - | + | - |
| 2993   | 57610 | GYPA         | RANBP10 | 7.214  | - | - | - | - | - | + | - |
| 2996   | 57610 | GYPE         | RANBP10 | 7.214  | - | - | - | - | - | + | - |
| 3005   | 57610 | H1F0         | RANBP10 | 7.214  | - | - | - | - | - | + | - |
| 3049   | 57610 | HBQ1         | RANBP10 | 7.214  | - | - | - | - | - | + | - |
| 3145   | 57610 | HMBS         | RANBP10 | 7.214  | - | - | - | - | - | + | - |
| 51312  | 57610 | MSCP         | RANBP10 | 10.149 | - | - | - | + | - | + | - |
| 23762  | 57610 | OSBP2        | RANBP10 | 7.214  | - | - | - | - | - | + | - |
| 5498   | 57610 | PPOX         | RANBP10 | 7.214  | - | - | - | - | - | + | - |
| 10098  | 57610 | TM4SF9       | RANBP10 | 7.214  | - | - | - | - | - | + | - |
| 23039  | 57610 | XPO7         | RANBP10 | 14.496 | - | - | - | + | - | + | - |
| 220972 | 6005  | March8       | RHAG    | 7.214  | - | - | - | - | - | + | - |
| 210    | 6005  | ALAD         | RHAG    | 7.214  | - | - | - | - | - | + | - |
| 212    | 6005  | ALAS2        | RHAG    | 7.214  | - | - | - | - | - | + | - |
| 286    | 6005  | ANK1         | RHAG    | 7.214  | - | - | - | - | - | + | - |
| 222642 | 6005  | <b>TSPO2</b> | RHAG    | 7.214  | - | - | - | - | - | + | - |
| 1193   | 6005  | CLIC2        | RHAG    | 8.256  | - | - | - | + | - | + | - |
| 27102  | 6005  | EIF2AK1      | RHAG    | 7.214  | - | - | - | - | - | + | - |
| 2035   | 6005  | EPB41        | RHAG    | 14.82  | - | - | - | + | - | + | - |

|        |      |              |      |        |   |   |   |   |   |   |   |
|--------|------|--------------|------|--------|---|---|---|---|---|---|---|
| 2038   | 6005 | EPB42        | RHAG | 7.214  | - | - | - | - | - | + | - |
| 51327  | 6005 | ERAF         | RHAG | 7.214  | - | - | - | - | - | + | - |
| 114625 | 6005 | ERMAP        | RHAG | 7.214  | - | - | - | - | - | + | - |
| 25793  | 6005 | FBXO7        | RHAG | 7.214  | - | - | - | - | - | + | - |
| 2235   | 6005 | FECH         | RHAG | 7.214  | - | - | - | - | - | + | - |
| 2993   | 6005 | GYPA         | RHAG | 9.626  | - | - | - | + | - | + | - |
| 2995   | 6005 | GYPC         | RHAG | 9.626  | - | - | - | + | - | + | - |
| 2996   | 6005 | GYPE         | RHAG | 9.626  | - | - | - | + | - | + | - |
| 3005   | 6005 | H1F0         | RHAG | 7.214  | - | - | - | - | - | + | - |
| 3049   | 6005 | HBQ1         | RHAG | 8.057  | - | - | - | + | - | + | - |
| 3145   | 6005 | HMBS         | RHAG | 7.214  | - | - | - | - | - | + | - |
| 4354   | 6005 | MPP1         | RHAG | 9.626  | - | - | - | + | - | + | - |
| 51312  | 6005 | MSCP         | RHAG | 8.057  | - | - | - | + | - | + | - |
| 4778   | 6005 | NFE2         | RHAG | 13.45  | - | - | - | + | - | + | - |
| 23762  | 6005 | OSBP2        | RHAG | 8.057  | - | - | - | + | - | + | - |
| 5498   | 6005 | PPOX         | RHAG | 7.214  | - | - | - | - | - | + | - |
| 5886   | 6005 | RAD23A       | RHAG | 7.214  | - | - | - | - | - | + | - |
| 57610  | 6005 | RANBP10      | RHAG | 7.214  | - | - | - | - | - | + | - |
| 10098  | 6005 | TM4SF9       | RHAG | 7.214  | - | - | - | - | - | + | - |
| 23039  | 6005 | XPO7         | RHAG | 8.057  | - | - | - | + | - | + | - |
| 220972 | 6006 | March8       | RHCE | 7.214  | - | - | - | - | - | + | - |
| 210    | 6006 | ALAD         | RHCE | 7.214  | - | - | - | - | - | + | - |
| 212    | 6006 | ALAS2        | RHCE | 7.214  | - | - | - | - | - | + | - |
| 286    | 6006 | ANK1         | RHCE | 7.214  | - | - | - | - | - | + | - |
| 222642 | 6006 | <b>TSPO2</b> | RHCE | 7.214  | - | - | - | - | - | + | - |
| 1193   | 6006 | CLIC2        | RHCE | 9.626  | - | - | - | + | - | + | - |
| 27102  | 6006 | EIF2AK1      | RHCE | 7.214  | - | - | - | - | - | + | - |
| 2035   | 6006 | EPB41        | RHCE | 9.626  | - | - | - | + | - | + | - |
| 2038   | 6006 | EPB42        | RHCE | 7.214  | - | - | - | - | - | + | - |
| 51327  | 6006 | ERAF         | RHCE | 7.214  | - | - | - | - | - | + | - |
| 114625 | 6006 | ERMAP        | RHCE | 7.214  | - | - | - | - | - | + | - |
| 25793  | 6006 | FBXO7        | RHCE | 7.214  | - | - | - | - | - | + | - |
| 2235   | 6006 | FECH         | RHCE | 7.214  | - | - | - | - | - | + | - |
| 2993   | 6006 | GYPA         | RHCE | 9.626  | - | - | - | + | - | + | - |
| 2995   | 6006 | GYPC         | RHCE | 9.626  | - | - | - | + | - | + | - |
| 2996   | 6006 | GYPE         | RHCE | 9.626  | - | - | - | + | - | + | - |
| 3005   | 6006 | H1F0         | RHCE | 7.214  | - | - | - | - | - | + | - |
| 3049   | 6006 | HBQ1         | RHCE | 9.626  | - | - | - | + | - | + | - |
| 3145   | 6006 | HMBS         | RHCE | 7.214  | - | - | - | - | - | + | - |
| 4354   | 6006 | MPP1         | RHCE | 9.626  | - | - | - | + | - | + | - |
| 51312  | 6006 | MSCP         | RHCE | 9.626  | - | - | - | + | - | + | - |
| 4778   | 6006 | NFE2         | RHCE | 7.214  | - | - | - | - | - | + | - |
| 23762  | 6006 | OSBP2        | RHCE | 8.057  | - | - | - | + | - | + | - |
| 5498   | 6006 | PPOX         | RHCE | 7.214  | - | - | - | - | - | + | - |
| 5886   | 6006 | RAD23A       | RHCE | 7.214  | - | - | - | - | - | + | - |
| 57610  | 6006 | RANBP10      | RHCE | 7.214  | - | - | - | - | - | + | - |
| 6005   | 6006 | RHAG         | RHCE | 15.785 | - | - | - | + | - | + | - |
| 10098  | 6006 | TM4SF9       | RHCE | 7.214  | - | - | - | - | - | + | - |
| 10107  | 6006 | TRIM10       | RHCE | 7.214  | - | - | - | - | - | + | - |
| 23039  | 6006 | XPO7         | RHCE | 8.057  | - | - | - | + | - | + | - |

|               |             |              |                 |              |   |   |   |   |   |   |   |
|---------------|-------------|--------------|-----------------|--------------|---|---|---|---|---|---|---|
| 220972        | 6007        | March8       | RHD             | 7.214        | - | - | - | - | - | + | - |
| 210           | 6007        | ALAD         | RHD             | 7.214        | - | - | - | - | - | + | - |
| 212           | 6007        | ALAS2        | RHD             | 7.214        | - | - | - | - | - | + | - |
| 286           | 6007        | ANK1         | RHD             | 7.214        | - | - | - | - | - | + | - |
| <b>222642</b> | <b>6007</b> | <b>TSPO2</b> | <b>RHD</b>      | <b>7.214</b> | - | - | - | - | - | + | - |
| 1193          | 6007        | CLIC2        | RHD             | 7.214        | - | - | - | - | - | + | - |
| 27102         | 6007        | EIF2AK1      | RHD             | 7.214        | - | - | - | - | - | + | - |
| 2035          | 6007        | EPB41        | RHD             | 7.214        | - | - | - | - | - | + | - |
| 2038          | 6007        | EPB42        | RHD             | 7.214        | - | - | - | - | - | + | - |
| 51327         | 6007        | ERAF         | RHD             | 7.214        | - | - | - | - | - | + | - |
| 114625        | 6007        | ERMAP        | RHD             | 7.214        | - | - | - | - | - | + | - |
| 25793         | 6007        | FBXO7        | RHD             | 7.214        | - | - | - | - | - | + | - |
| 2235          | 6007        | FECH         | RHD             | 7.214        | - | - | - | - | - | + | - |
| 2993          | 6007        | GYPA         | RHD             | 7.214        | - | - | - | - | - | + | - |
| 2995          | 6007        | GYPC         | RHD             | 9.626        | - | - | - | + | - | + | - |
| 2996          | 6007        | GYPE         | RHD             | 9.626        | - | - | - | + | - | + | - |
| 3005          | 6007        | H1F0         | RHD             | 7.214        | - | - | - | - | - | + | - |
| 3049          | 6007        | HBQ1         | RHD             | 7.214        | - | - | - | - | - | + | - |
| 3145          | 6007        | HMBS         | RHD             | 7.214        | - | - | - | - | - | + | - |
| 4354          | 6007        | MPP1         | RHD             | 9.626        | - | - | - | + | - | + | - |
| 4778          | 6007        | NFE2         | RHD             | 7.214        | - | - | - | - | - | + | - |
| 23762         | 6007        | OSBP2        | RHD             | 7.214        | - | - | - | - | - | + | - |
| 5498          | 6007        | PPOX         | RHD             | 7.214        | - | - | - | - | - | + | - |
| 5886          | 6007        | RAD23A       | RHD             | 7.214        | - | - | - | - | - | + | - |
| 57610         | 6007        | RANBP10      | RHD             | 7.214        | - | - | - | - | - | + | - |
| 6005          | 6007        | RHAG         | RHD             | 9.626        | - | - | - | + | - | + | - |
| 6006          | 6007        | RHCE         | RHD             | 9.626        | - | - | - | + | - | + | - |
| 10098         | 6007        | TM4SF9       | RHD             | 7.214        | - | - | - | - | - | + | - |
| 23039         | 6007        | XPO7         | RHD             | 7.214        | - | - | - | - | - | + | - |
| 220972        | 8991        | March8       | SELENBP1        | 7.214        | - | - | - | - | - | + | - |
| 210           | 8991        | ALAD         | SELENBP1        | 7.214        | - | - | - | - | - | + | - |
| 212           | 8991        | ALAS2        | SELENBP1        | 7.214        | - | - | - | - | - | + | - |
| 66008         | 8991        | ALS2CR3      | SELENBP1        | 7.214        | - | - | - | - | - | + | - |
| 286           | 8991        | ANK1         | SELENBP1        | 7.214        | - | - | - | - | - | + | - |
| 665           | 8991        | BNIP3L       | SELENBP1        | 7.214        | - | - | - | - | - | + | - |
| 682           | 8991        | BSG          | SELENBP1        | 7.214        | - | - | - | - | - | + | - |
| <b>222642</b> | <b>8991</b> | <b>TSPO2</b> | <b>SELENBP1</b> | <b>7.214</b> | - | - | - | - | - | + | - |
| 760           | 8991        | CA2          | SELENBP1        | 7.214        | - | - | - | - | - | + | - |
| 1193          | 8991        | CLIC2        | SELENBP1        | 7.214        | - | - | - | - | - | + | - |
| 27102         | 8991        | EIF2AK1      | SELENBP1        | 7.214        | - | - | - | - | - | + | - |
| 2035          | 8991        | EPB41        | SELENBP1        | 7.214        | - | - | - | - | - | + | - |
| 2038          | 8991        | EPB42        | SELENBP1        | 7.214        | - | - | - | - | - | + | - |
| 51327         | 8991        | ERAF         | SELENBP1        | 7.214        | - | - | - | - | - | + | - |
| 114625        | 8991        | ERMAP        | SELENBP1        | 7.214        | - | - | - | - | - | + | - |
| 25793         | 8991        | FBXO7        | SELENBP1        | 7.214        | - | - | - | - | - | + | - |
| 2235          | 8991        | FECH         | SELENBP1        | 7.214        | - | - | - | - | - | + | - |
| 2993          | 8991        | GYPA         | SELENBP1        | 7.214        | - | - | - | - | - | + | - |
| 2995          | 8991        | GYPC         | SELENBP1        | 7.214        | - | - | - | - | - | + | - |
| 2996          | 8991        | GYPE         | SELENBP1        | 7.214        | - | - | - | - | - | + | - |
| 3005          | 8991        | H1F0         | SELENBP1        | 7.214        | - | - | - | - | - | + | - |

|               |             |              |                |              |   |   |   |   |   |          |   |
|---------------|-------------|--------------|----------------|--------------|---|---|---|---|---|----------|---|
| 3049          | 8991        | HBQ1         | SELENBP1       | 7.214        | - | - | - | - | - | +        | - |
| 8364          | 8991        | HIST1H4C     | SELENBP1       | 7.214        | - | - | - | - | - | +        | - |
| 3145          | 8991        | HMBS         | SELENBP1       | 7.214        | - | - | - | - | - | +        | - |
| 4354          | 8991        | MPP1         | SELENBP1       | 7.214        | - | - | - | - | - | +        | - |
| 51312         | 8991        | MSCP         | SELENBP1       | 7.214        | - | - | - | - | - | +        | - |
| 4778          | 8991        | NFE2         | SELENBP1       | 7.214        | - | - | - | - | - | +        | - |
| 23762         | 8991        | OSBP2        | SELENBP1       | 7.214        | - | - | - | - | - | +        | - |
| 5498          | 8991        | PPOX         | SELENBP1       | 7.214        | - | - | - | - | - | +        | - |
| 5886          | 8991        | RAD23A       | SELENBP1       | 7.214        | - | - | - | - | - | +        | - |
| 57610         | 8991        | RANBP10      | SELENBP1       | 7.214        | - | - | - | - | - | +        | - |
| 6005          | 8991        | RHAG         | SELENBP1       | 7.214        | - | - | - | - | - | +        | - |
| 6006          | 8991        | RHCE         | SELENBP1       | 7.214        | - | - | - | - | - | +        | - |
| 6007          | 8991        | RHD          | SELENBP1       | 7.214        | - | - | - | - | - | +        | - |
| 6583          | 8991        | SLC22A4      | SELENBP1       | 7.214        | - | - | - | - | - | +        | - |
| 6521          | 8991        | SLC4A1       | SELENBP1       | 7.214        | - | - | - | - | - | +        | - |
| 6708          | 8991        | SPTA1        | SELENBP1       | 7.214        | - | - | - | - | - | +        | - |
| 10098         | 8991        | TM4SF9       | SELENBP1       | 7.214        | - | - | - | - | - | +        | - |
| 10107         | 8991        | TRIM10       | SELENBP1       | 7.214        | - | - | - | - | - | +        | - |
| 23039         | 8991        | XPO7         | SELENBP1       | 7.214        | - | - | - | - | - | +        | - |
| 220972        | 6583        | March8       | SLC22A4        | 7.214        | - | - | - | - | - | +        | - |
| 210           | 6583        | ALAD         | SLC22A4        | 7.214        | - | - | - | - | - | +        | - |
| 212           | 6583        | ALAS2        | SLC22A4        | 8.057        | - | - | - | + | - | +        | - |
| 286           | 6583        | ANK1         | SLC22A4        | 7.214        | - | - | - | - | - | +        | - |
| <b>222642</b> | <b>6583</b> | <b>TSPO2</b> | <b>SLC22A4</b> | <b>7.214</b> | - | - | - | - | - | <b>+</b> | - |
| 1193          | 6583        | CLIC2        | SLC22A4        | 11.027       | - | - | - | + | - | +        | - |
| 2035          | 6583        | EPB41        | SLC22A4        | 7.214        | - | - | - | - | - | +        | - |
| 2038          | 6583        | EPB42        | SLC22A4        | 7.214        | - | - | - | - | - | +        | - |
| 51327         | 6583        | ERAF         | SLC22A4        | 7.214        | - | - | - | - | - | +        | - |
| 114625        | 6583        | ERMAP        | SLC22A4        | 7.214        | - | - | - | - | - | +        | - |
| 25793         | 6583        | FBXO7        | SLC22A4        | 7.214        | - | - | - | - | - | +        | - |
| 2235          | 6583        | FECH         | SLC22A4        | 8.057        | - | - | - | + | - | +        | - |
| 2993          | 6583        | GYPA         | SLC22A4        | 7.214        | - | - | - | - | - | +        | - |
| 2995          | 6583        | GYPC         | SLC22A4        | 7.214        | - | - | - | - | - | +        | - |
| 2996          | 6583        | GYPE         | SLC22A4        | 7.214        | - | - | - | - | - | +        | - |
| 3005          | 6583        | H1F0         | SLC22A4        | 7.214        | - | - | - | - | - | +        | - |
| 3049          | 6583        | HBQ1         | SLC22A4        | 8.057        | - | - | - | + | - | +        | - |
| 3145          | 6583        | HMBS         | SLC22A4        | 7.214        | - | - | - | - | - | +        | - |
| 4354          | 6583        | MPP1         | SLC22A4        | 7.214        | - | - | - | - | - | +        | - |
| 51312         | 6583        | MSCP         | SLC22A4        | 8.057        | - | - | - | + | - | +        | - |
| 4778          | 6583        | NFE2         | SLC22A4        | 7.214        | - | - | - | - | - | +        | - |
| 23762         | 6583        | OSBP2        | SLC22A4        | 8.057        | - | - | - | + | - | +        | - |
| 5498          | 6583        | PPOX         | SLC22A4        | 8.057        | - | - | - | + | - | +        | - |
| 57610         | 6583        | RANBP10      | SLC22A4        | 7.214        | - | - | - | - | - | +        | - |
| 6005          | 6583        | RHAG         | SLC22A4        | 8.057        | - | - | - | + | - | +        | - |
| 6006          | 6583        | RHCE         | SLC22A4        | 8.057        | - | - | - | + | - | +        | - |
| 6007          | 6583        | RHD          | SLC22A4        | 7.214        | - | - | - | - | - | +        | - |
| 6521          | 6583        | SLC4A1       | SLC22A4        | 8.057        | - | - | - | + | - | +        | - |
| 10098         | 6583        | TM4SF9       | SLC22A4        | 7.214        | - | - | - | - | - | +        | - |
| 23039         | 6583        | XPO7         | SLC22A4        | 8.057        | - | - | - | + | - | +        | - |
| 220972        | 6521        | March8       | SLC4A1         | 7.214        | - | - | - | - | - | +        | - |



|               |             |              |               |              |   |   |   |   |   |   |   |
|---------------|-------------|--------------|---------------|--------------|---|---|---|---|---|---|---|
| 210           | 6521        | ALAD         | SLC4A1        | 7.214        | - | - | - | - | - | + | - |
| 212           | 6521        | ALAS2        | SLC4A1        | 7.214        | - | - | - | - | - | + | - |
| 286           | 6521        | ANK1         | SLC4A1        | 7.214        | - | - | - | - | - | + | - |
| <b>222642</b> | <b>6521</b> | <b>TSPO2</b> | <b>SLC4A1</b> | <b>7.214</b> | - | - | - | - | - | + | - |
| 27102         | 6521        | EIF2AK1      | SLC4A1        | 7.214        | - | - | - | - | - | + | - |
| 2035          | 6521        | EPB41        | SLC4A1        | 7.549        | - | - | - | - | + | + | - |
| 2038          | 6521        | EPB42        | SLC4A1        | 7.214        | - | - | - | - | - | + | - |
| 51327         | 6521        | ERAF         | SLC4A1        | 7.214        | - | - | - | - | - | + | - |
| 114625        | 6521        | ERMAP        | SLC4A1        | 7.214        | - | - | - | - | - | + | - |
| 25793         | 6521        | FBXO7        | SLC4A1        | 7.214        | - | - | - | - | - | + | - |
| 2235          | 6521        | FECH         | SLC4A1        | 7.214        | - | - | - | - | - | + | - |
| 2993          | 6521        | GYPA         | SLC4A1        | 11.004       | - | - | - | + | - | + | - |
| 2995          | 6521        | GYPC         | SLC4A1        | 9.626        | - | - | - | + | - | + | - |
| 2996          | 6521        | GYPE         | SLC4A1        | 9.626        | - | - | - | + | - | + | - |
| 3005          | 6521        | H1F0         | SLC4A1        | 7.214        | - | - | - | - | - | + | - |
| 3049          | 6521        | HBQ1         | SLC4A1        | 8.057        | - | - | - | + | - | + | - |
| 3145          | 6521        | HMBS         | SLC4A1        | 7.214        | - | - | - | - | - | + | - |
| 4354          | 6521        | MPP1         | SLC4A1        | 9.626        | - | - | - | + | - | + | - |
| 51312         | 6521        | MSCP         | SLC4A1        | 8.057        | - | - | - | + | - | + | - |
| 4778          | 6521        | NFE2         | SLC4A1        | 7.214        | - | - | - | - | - | + | - |
| 23762         | 6521        | OSBP2        | SLC4A1        | 8.057        | - | - | - | + | - | + | - |
| 5498          | 6521        | PPOX         | SLC4A1        | 7.549        | - | - | - | - | + | + | - |
| 5886          | 6521        | RAD23A       | SLC4A1        | 7.214        | - | - | - | - | - | + | - |
| 57610         | 6521        | RANBP10      | SLC4A1        | 7.214        | - | - | - | - | - | + | - |
| 6005          | 6521        | RHAG         | SLC4A1        | 9.626        | - | - | - | + | - | + | - |
| 6006          | 6521        | RHCE         | SLC4A1        | 9.626        | - | - | - | + | - | + | - |
| 6007          | 6521        | RHD          | SLC4A1        | 9.626        | - | - | - | + | - | + | - |
| 10098         | 6521        | TM4SF9       | SLC4A1        | 7.214        | - | - | - | - | - | + | - |
| 10107         | 6521        | TRIM10       | SLC4A1        | 7.214        | - | - | - | - | - | + | - |
| 23039         | 6521        | XPO7         | SLC4A1        | 8.057        | - | - | - | + | - | + | - |
| 220972        | 6708        | March8       | SPTA1         | 7.214        | - | - | - | - | - | + | - |
| 210           | 6708        | ALAD         | SPTA1         | 7.214        | - | - | - | - | - | + | - |
| 212           | 6708        | ALAS2        | SPTA1         | 7.214        | - | - | - | - | - | + | - |
| 66008         | 6708        | ALS2CR3      | SPTA1         | 7.549        | - | - | - | - | + | + | - |
| 286           | 6708        | ANK1         | SPTA1         | 12.47        | - | - | - | + | - | + | - |
| 665           | 6708        | BNIP3L       | SPTA1         | 7.214        | - | - | - | - | - | + | - |
| <b>222642</b> | <b>6708</b> | <b>TSPO2</b> | <b>SPTA1</b>  | <b>7.214</b> | - | - | - | - | - | + | - |
| 1193          | 6708        | CLIC2        | SPTA1         | 11.027       | - | - | - | + | - | + | - |
| 27102         | 6708        | EIF2AK1      | SPTA1         | 7.214        | - | - | - | - | - | + | - |
| 2035          | 6708        | EPB41        | SPTA1         | 16.739       | - | - | - | + | - | + | - |
| 2038          | 6708        | EPB42        | SPTA1         | 14.82        | - | - | - | + | - | + | - |
| 51327         | 6708        | ERAF         | SPTA1         | 7.214        | - | - | - | - | - | + | - |
| 114625        | 6708        | ERMAP        | SPTA1         | 7.214        | - | - | - | - | - | + | - |
| 25793         | 6708        | FBXO7        | SPTA1         | 7.214        | - | - | - | - | - | + | - |
| 2235          | 6708        | FECH         | SPTA1         | 7.214        | - | - | - | - | - | + | - |
| 2993          | 6708        | GYPA         | SPTA1         | 11.027       | - | - | - | + | - | + | - |
| 2995          | 6708        | GYPC         | SPTA1         | 7.214        | - | - | - | - | - | + | - |
| 2996          | 6708        | GYPE         | SPTA1         | 7.214        | - | - | - | - | - | + | - |
| 3005          | 6708        | H1F0         | SPTA1         | 7.214        | - | - | - | - | - | + | - |
| 3049          | 6708        | HBQ1         | SPTA1         | 7.214        | - | - | - | - | - | + | - |

|               |              |              |             |              |   |   |   |   |   |          |   |
|---------------|--------------|--------------|-------------|--------------|---|---|---|---|---|----------|---|
| 3145          | 6708         | HMBS         | SPTA1       | 7.214        | - | - | - | - | - | +        | - |
| 4354          | 6708         | MPP1         | SPTA1       | 11.027       | - | - | - | + | - | +        | - |
| 51312         | 6708         | MSCP         | SPTA1       | 7.214        | - | - | - | - | - | +        | - |
| 4778          | 6708         | NFE2         | SPTA1       | 7.214        | - | - | - | - | - | +        | - |
| 23762         | 6708         | OSBP2        | SPTA1       | 7.214        | - | - | - | - | - | +        | - |
| 5498          | 6708         | PPOX         | SPTA1       | 7.214        | - | - | - | - | - | +        | - |
| 5886          | 6708         | RAD23A       | SPTA1       | 7.214        | - | - | - | - | - | +        | - |
| 57610         | 6708         | RANBP10      | SPTA1       | 7.214        | - | - | - | - | - | +        | - |
| 6005          | 6708         | RHAG         | SPTA1       | 9.626        | - | - | - | + | - | +        | - |
| 6006          | 6708         | RHCE         | SPTA1       | 9.626        | - | - | - | + | - | +        | - |
| 6007          | 6708         | RHD          | SPTA1       | 7.214        | - | - | - | - | - | +        | - |
| 6583          | 6708         | SLC22A4      | SPTA1       | 7.214        | - | - | - | - | - | +        | - |
| 6521          | 6708         | SLC4A1       | SPTA1       | 7.214        | - | - | - | - | - | +        | - |
| 10098         | 6708         | TM4SF9       | SPTA1       | 7.214        | - | - | - | - | - | +        | - |
| 10107         | 6708         | TRIM10       | SPTA1       | 7.214        | - | - | - | - | - | +        | - |
| 23039         | 6708         | XPO7         | SPTA1       | 7.257        | - | - | - | - | + | +        | - |
| 220972        | 9911         | March8       | TMCC2       | 7.214        | - | - | - | - | - | +        | - |
| 212           | 9911         | ALAS2        | TMCC2       | 7.214        | - | - | - | - | - | +        | - |
| 66008         | 9911         | ALS2CR3      | TMCC2       | 7.214        | - | - | - | - | - | +        | - |
| 286           | 9911         | ANK1         | TMCC2       | 7.214        | - | - | - | - | - | +        | - |
| 665           | 9911         | BNIP3L       | TMCC2       | 7.214        | - | - | - | - | - | +        | - |
| 222642        | 9911         | <b>TSPO2</b> | TMCC2       | 7.214        | - | - | - | - | - | +        | - |
| 760           | 9911         | CA2          | TMCC2       | 7.214        | - | - | - | - | - | +        | - |
| 63893         | 9911         | E2-230K      | TMCC2       | 7.214        | - | - | - | - | - | +        | - |
| 2035          | 9911         | EPB41        | TMCC2       | 7.214        | - | - | - | - | - | +        | - |
| 2038          | 9911         | EPB42        | TMCC2       | 7.214        | - | - | - | - | - | +        | - |
| 114625        | 9911         | ERMAP        | TMCC2       | 7.214        | - | - | - | - | - | +        | - |
| 25793         | 9911         | FBXO7        | TMCC2       | 7.214        | - | - | - | - | - | +        | - |
| 2235          | 9911         | FECH         | TMCC2       | 7.214        | - | - | - | - | - | +        | - |
| 2993          | 9911         | GYPA         | TMCC2       | 7.214        | - | - | - | - | - | +        | - |
| 2996          | 9911         | GYPE         | TMCC2       | 7.214        | - | - | - | - | - | +        | - |
| 3005          | 9911         | H1F0         | TMCC2       | 7.214        | - | - | - | - | - | +        | - |
| 8364          | 9911         | HIST1H4C     | TMCC2       | 7.214        | - | - | - | - | - | +        | - |
| 3145          | 9911         | HMBS         | TMCC2       | 7.214        | - | - | - | - | - | +        | - |
| 23762         | 9911         | OSBP2        | TMCC2       | 7.214        | - | - | - | - | - | +        | - |
| 5498          | 9911         | PPOX         | TMCC2       | 7.214        | - | - | - | - | - | +        | - |
| 57610         | 9911         | RANBP10      | TMCC2       | 7.214        | - | - | - | - | - | +        | - |
| 6005          | 9911         | RHAG         | TMCC2       | 7.214        | - | - | - | - | - | +        | - |
| 6006          | 9911         | RHCE         | TMCC2       | 7.214        | - | - | - | - | - | +        | - |
| 6007          | 9911         | RHD          | TMCC2       | 7.214        | - | - | - | - | - | +        | - |
| 8991          | 9911         | SELENBP1     | TMCC2       | 7.214        | - | - | - | - | - | +        | - |
| 6583          | 9911         | SLC22A4      | TMCC2       | 7.214        | - | - | - | - | - | +        | - |
| 6521          | 9911         | SLC4A1       | TMCC2       | 7.214        | - | - | - | - | - | +        | - |
| 6708          | 9911         | SPTA1        | TMCC2       | 7.214        | - | - | - | - | - | +        | - |
| 10098         | 9911         | TM4SF9       | TMCC2       | 7.214        | - | - | - | - | - | +        | - |
| 23039         | 9911         | XPO7         | TMCC2       | 7.214        | - | - | - | - | - | +        | - |
| 220972        | 23039        | March8       | XPO7        | 7.214        | - | - | - | - | - | +        | - |
| 210           | 23039        | ALAD         | XPO7        | 7.214        | - | - | - | - | - | +        | - |
| 212           | 23039        | ALAS2        | XPO7        | 7.214        | - | - | - | - | - | +        | - |
| <b>222642</b> | <b>23039</b> | <b>TSPO2</b> | <b>XPO7</b> | <b>7.214</b> | - | - | - | - | - | <b>+</b> | - |

|        |       |        |      |        |   |   |   |   |   |   |   |
|--------|-------|--------|------|--------|---|---|---|---|---|---|---|
| 1193   | 23039 | CLIC2  | XPO7 | 7.214  | - | - | - | - | - | + | - |
| 2035   | 23039 | EPB41  | XPO7 | 11.746 | - | - | - | + | + | + | - |
| 2038   | 23039 | EPB42  | XPO7 | 7.214  | - | - | - | - | - | + | - |
| 114625 | 23039 | ERMAP  | XPO7 | 7.214  | - | - | - | - | - | + | - |
| 2235   | 23039 | FECH   | XPO7 | 7.214  | - | - | - | - | - | + | - |
| 10098  | 23039 | TM4SF9 | XPO7 | 7.214  | - | - | - | - | - | + | - |
| 10107  | 23039 | TRIM10 | XPO7 | 8.057  | - | - | - | + | - | + | - |

Note: PPI, protein-protein interaction; GI, Genetic interactions ; DDI, Domain-domain interaction.

**Figure S1.** Alignment of the deduced amino acid sequence of TSPO and TSPO-like genes. The TSPO-like domains are indicated as follows: TM1-TM5, transmembrane domains. The red letters with black background indicate the potential PK11195 binding sites: R24, E29, L31, L37, P40, S41, W42, W107, and W161; E29, R32, K39, and V154 (in human) indicate the essential amino acid sites responsible for the benzodiazepine binding. E, R, and K indicate the essential amino acid sites responsible for the benzodiazepine binding. Upside-down arrowheads indicate the cholesterol binding sites, and conserved motif, L/I.Y...R, is indicated. The two conserved intron positions are indicated. Residues that show 100 percent conservation, 80 percent, or greater conservation, and 60 percent or greater conservation are highlighted in black, dark grey, and light grey, respectively. The top two conservation levels are also distinguished by either upper or lower case characters or numbers on the consensus line below the alignment. Similar amino acids are defined by Higgins (20) as being grouped in the same class as identity. Dashes indicate gaps introduced to facilitate alignment.

**Figure S2.** Different patterns of the transcription of *Tspo1/Tspo2*. **A.** Gene networks of human *Tspo1* and *Tspo2*. The gene networks were constructed through the IntNetDB server (<http://hanlab.genetics.ac.cn/IntNetDB.htm>) using human *TSPO2* (Gene ID: 222642) and *TSPO1* (Gene ID: 706) as probes. **B.** Alignment of the N-terminal peptide sequence of the avian TSPO2 with the predicted amino acid sequences of TSPOs from avians, mouse, and human. Previously designated p18 was shown to be the avian *Tspo2*, which may be involved in a nuclear membrane complex and cholesterol synthesis (12). Erythrocyte-related genes in the TSPO2 network: aminolevulinate delta-synthase 2 (ALAS2); erythrocyte membrane protein band4.1 (EPB41); basigin (Ok blood group) (EPB41); tripartite motif-containing 10 (TRIM10); nuclear factor (erythroid-derived 2) (NFE2); glycophorin C (GYPC); hemoglobin theta 1 (HBQ1); Rh-associated glycoprotein (RHAG); erythroblast membrane-associated protein (ERMAP); erythrocyte membrane protein band 4.2 (EPB42); protoporphyrinogen oxidase (PPOX); erythroid associated factor (ERAF); hydroxymethylbilane synthase (HMBS); spectrin alpha erythrocytic 1 (SPTA1); solute carrier family 4 anion exchanger member 1 (SLC4A1); ferrochelatase (protoporphyrin) (FECH); aminolevulinate delta-dehydratase (ALAD); Rh blood group CcEe antigens (RHCE); Rh blood group D antigen (RHD); ankyrin 1 erythrocytic (ANK1); glycophorin A (GYPA); F-box protein 7 (FBXO7); eukaryotic translation initiation factor 2-alpha kinase 1 (EIF2AK1); carbonic anhydrase II (CA2); solute carrier family 22 (SLC22A4); exportin 7 (XPO7); oxysterol binding protein 2 (OSBP2).

**Figure S3.** Colocalization of TSPO2 and TSPO1 and localization of TSPO2 onto ER (highlight from figure 2). **A,** Colocalization of mTSPO2 and mTSPO1 in NIH 3T3 cells. **B,** localization of mTSPO2 onto ER in NIH 3T3 cells. **C,** Colocalization of mTSPO2 and mTSPO1 in MA-10 cells. **D,** localization of mTSPO2 onto ER in MA-10 cells. **E,** Colocalization of hTSPO2 and mTSPO1 in HeLa cells. **F,** localization of hTSPO2 onto ER in HeLa cells. Green: TSPO2; Red, TSPO1; ER, Blue; Colocalization pixels, white.

**Figure S4.** Localization of TSPO2 onto ER. **A,** Colocalization of mTSPO2 and ER marker (RdFP2-with ER-retention tail) in NIH 3T3 cells. **B,** colocalization of mTSPO2 and ER marker (RdFP2-with ER-retention tail) in MA-10 cells; **C,** Colocalization of hTSPO2 and ER marker (RdFP2-with ER-retention tail) in HeLa cells. Green, GFP-TSPO2; Red, RFP-ER marker; Green and red, merged image and Hoechst 33342 nuclear staining with blue.

**Figure S5.** Subcellular localization of mouse TSPO2 in cultured mouse and human cells. GFP-tagged mTSPO2 and hTSPO2 transfected into NIH 3T3 (**A-C**), MA-10 (**D-F**), HeLa (**G-I**) cells. The ER membrane was labeled with ER-tracker Blue-White DPX and then visualized by a multi-photon Zeiss 510 laser scanning microscope. **A, D, G** are GFP; **B, E, H** are ER-tracker Blue-White DPX; **C, F, I** are GFP and ER-tracker merged. Bars: 5  $\mu$ m. **J, K and L**, Highlight of the localization of TSPO2 (green) on ER (grey) from NIH 3T3 (**J**), MA-10 (**K**) and HeLa (**L**) cells.

**Figure S6.** Schematic structure of human (**A**) and mouse (**B**) TSPO1/TSPO2 models. The primary sequence shown is that of human TSPO1 and TSPO2, and that of mouse TSPO and TSPO2 to illustrate the five transmembrane domains and cytoplasmic domains. The *lines* indicate the mitochondrial membrane. *c1* and *c2* refer to extramitochondrial cytoplasmic loops, *m1* and *m2* to intramitochondrial loops, *n1* and *n2*, to intra-nuclear membrane loops, *Ct* and *Nt* to the carboxyl- and amino-terminal domains, respectively. The position of the unique sites under positive selection in the TSPO2 lineage are shown in red arrow. Dark arrowheads indicate potential important amino acid residues for binding benzodiazepine. Also noted as arrows are the conserved motif of L.Y...D, corresponding to the previous reported cholesterol recognition/interaction amino acid consensus (CRAC) domain (21). The open circles are the omitted amino acid positions. The snake-like diagram was constructed by using residue-based diagram editor RbDe (22).

**Figure S7.** NBD-cholesterol uptake assay (presenting the DIC images for the whole set shown in Fig. 3M to 3N). **M**, *S. cerevisiae* strains were induced with 2% galactose to overexpress mTSPO2 in the presence of NBD-cholesterol and under the aerobic conditions ( $> O_2$ ; c and d). Vector alone cells were used as control (a and b). **N**, NBD-cholesterol uptake assay. *S. cerevisiae* strains were induced with 2% galactose to overexpress mTSPO2 in the presence of NBD-cholesterol and under the anaerobic conditions ( $< O_2$ ; g and h). Vector alone was used as the control (e and f). Differential interference contrast (DIC) images of the cells were shown at the left (b, d, f, and h).

**Figure S8.** Expression profiling of *Tspo2* in 15 mouse and 7 human tissues using RT-PCR. *Tspo2* was only detected weakly in E7, and strongly in the of E11, E15, and E17 stages. Among the 10 adult mouse and 7 human tissues tested, the only tissue where TSPO2 was expressed in both species was spleen. As controls, the mouse and human TSPO1, mouse tubulin, and human HPRT genes were detected in every tissue examined. **A**. *Tspo2* expression was detected in RT-PCR using gene-specific primers. **B**. *Tspo1* expression was detected in RT-PCR using gene-specific primers. **C**. As control is shown the results from a RT-PCR performed with the same cDNAs but with mouse tubulin-specific primers. The total RNAs from different tissues were from Mouse Total RNA Master Panel (Clontech, USA). Lane 1, brain; 2, E7; 3, E11; 4, E15; 5, E17; 6, eye; 7, heart; 8, kidney; 9, liver; 10, lymph; 11, salivary gland; 12, spinal cord; 13, spleen; 14, stomach; 15, uterus. **D**. Expression profiling of hTSPO2 in thyroid tumor (lane 1) and normal thyroid (lane 2); lymphoma (lane 3) and normal lymphocytes (lane 4); fetal brain (lane 5); spleen (lane 6); and Jurkat cells (lane 7). hTSPO2 expression was detected in RT-PCR using gene-specific primers. As control is shown the results from a RT-PCR performed with the same cDNAs but with human TSPO1- and human HPRT-specific primers. The total RNAs from thyroid and lymphoma tissues were from Ambion and the total RNAs from human fetal brain and human spleen were from BioChain. The total RNA from jurkat cells were extracted using Trizol Reagent (Invitrogen) as described in materials and methods.

**Figure S9.** Effect of TSPO2 C-terminal CRAC-domain on intracellular cholesterol distribution. HeLa cells were transfected with plasmids containing mutant hTSPO2 with deletion of its C-

terminal CRAC domain, wild-type hTSPO2, and pDsRed monomer C1 vector alone. The cells were then treated with NBD-cholesterol as described under Experimental Procedures. **A-C**. Mutant DsRed-hTSPO2 with deletion of the CRAC domain; **D-F**, Wild-type DsRed-hTSPO2; **G-I**, pDsRed monomer C1 vector. **A**, **D** and **G**. DsRed-fusion proteins (Red). **B**, **E** and **H**. NBD-cholesterol (Green); **C**, **F** and **I**. Superimposed images with Hoechst 33342 (Nuclear staining; Blue). **J-O**. Intensity surface plots of the images as shown in A-C and D-F. The non-evenly distributed cholesterol in HeLa cells transfected with the hTSPO2 CRAC mutant is highlighted in **K**.

Supplementary Figure 1.

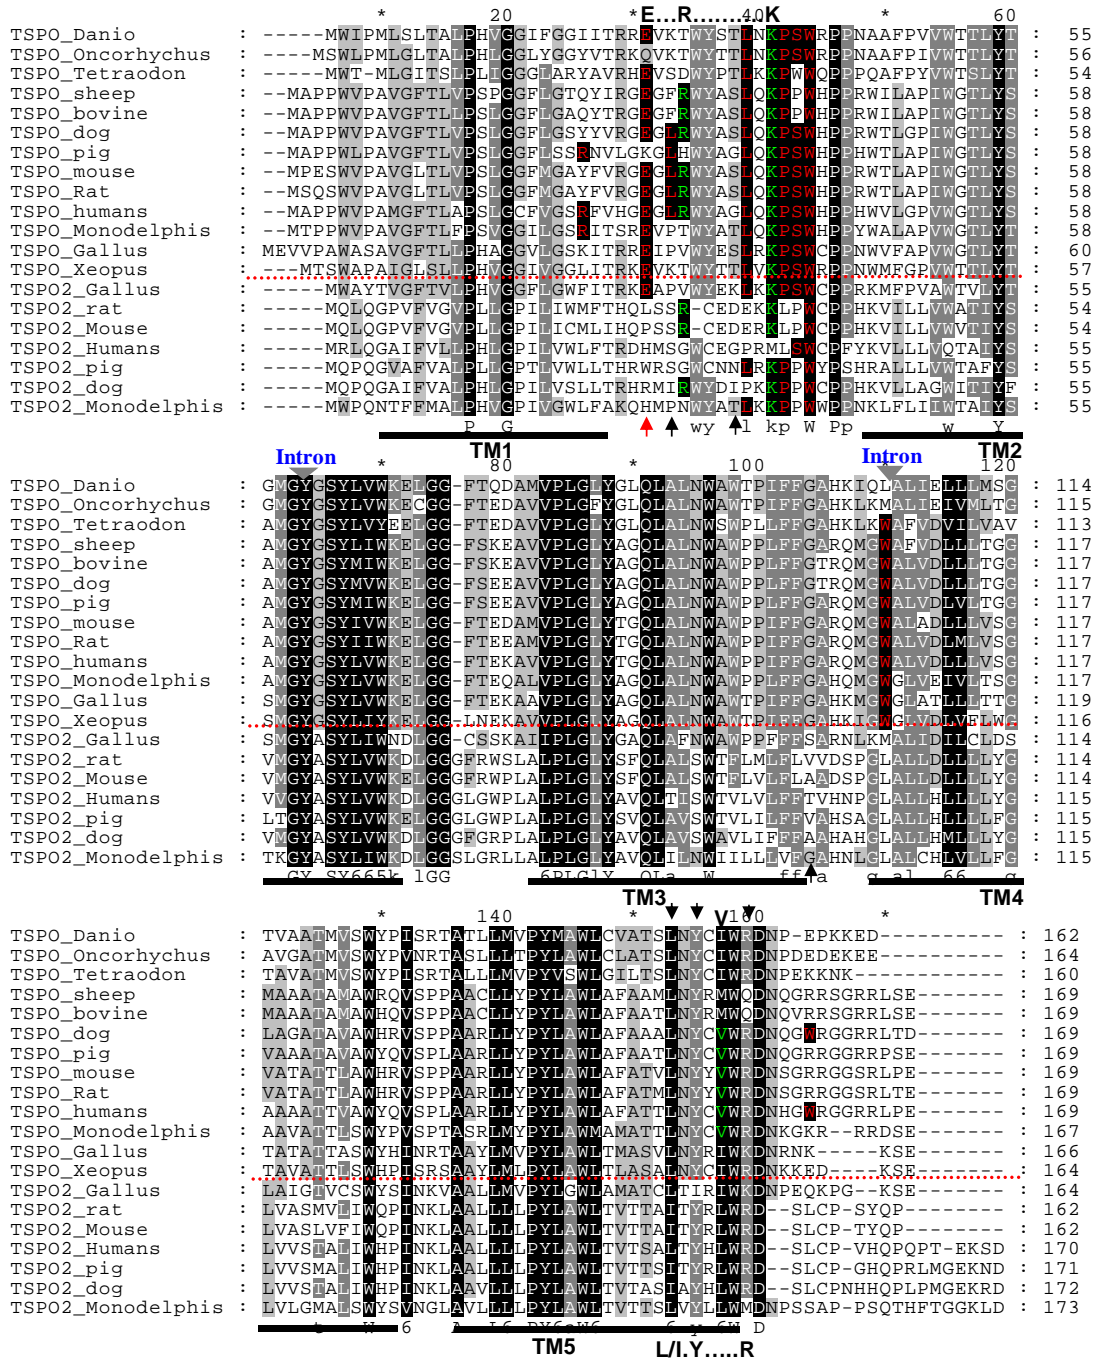





Supplementary Figure 3

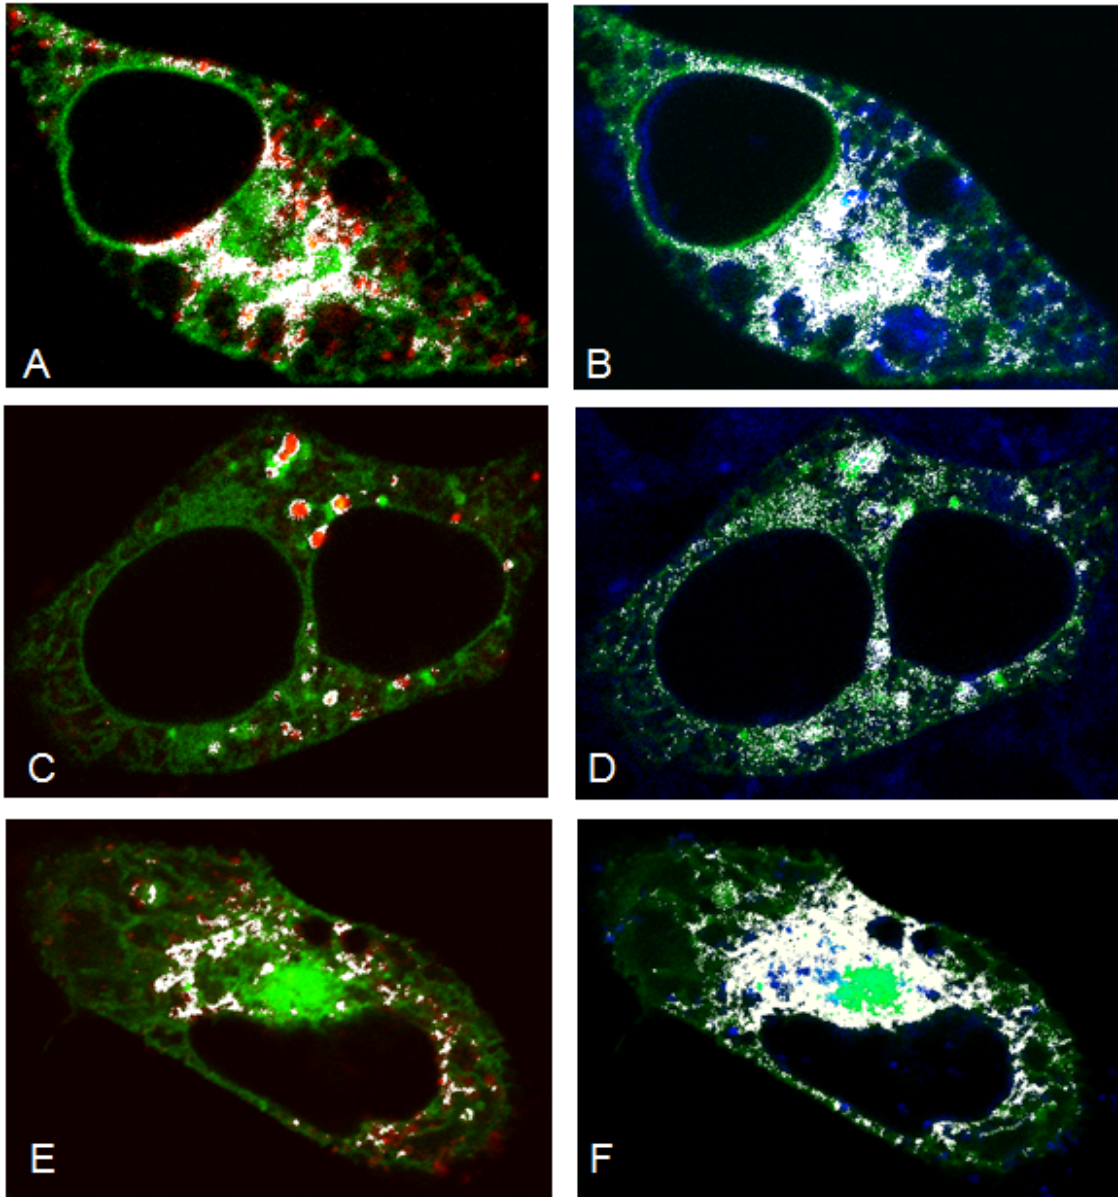

Supplementary Figure 4

**A**

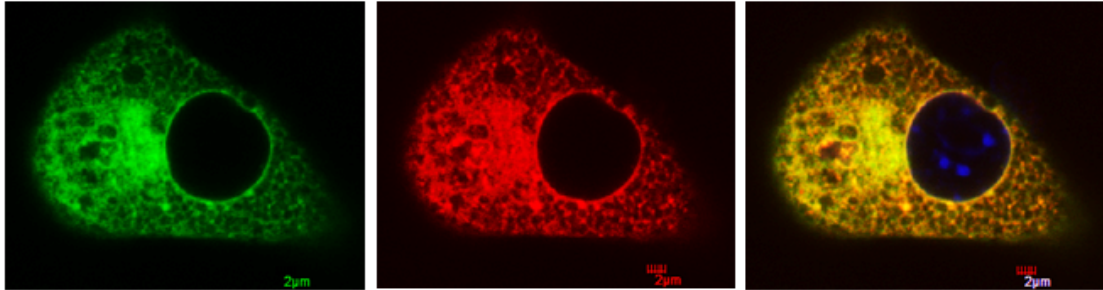

**B**

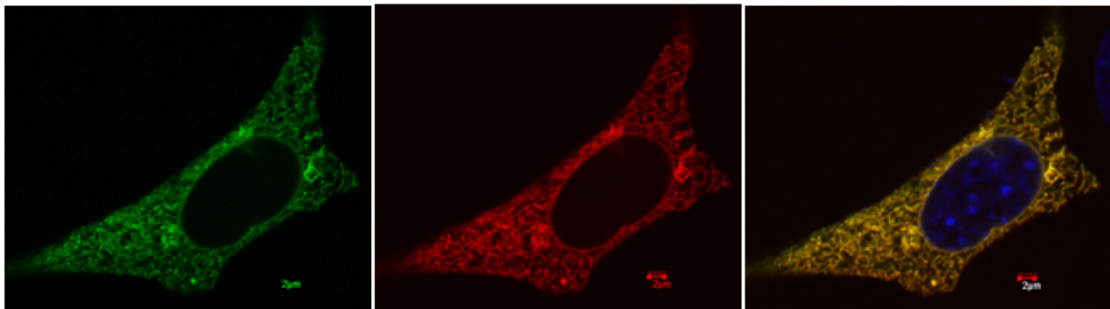

**C**

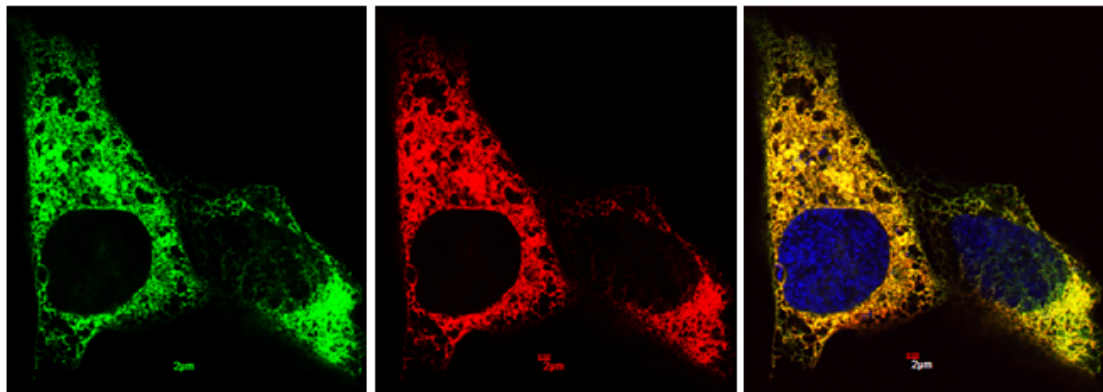

Supplementary Figure 5

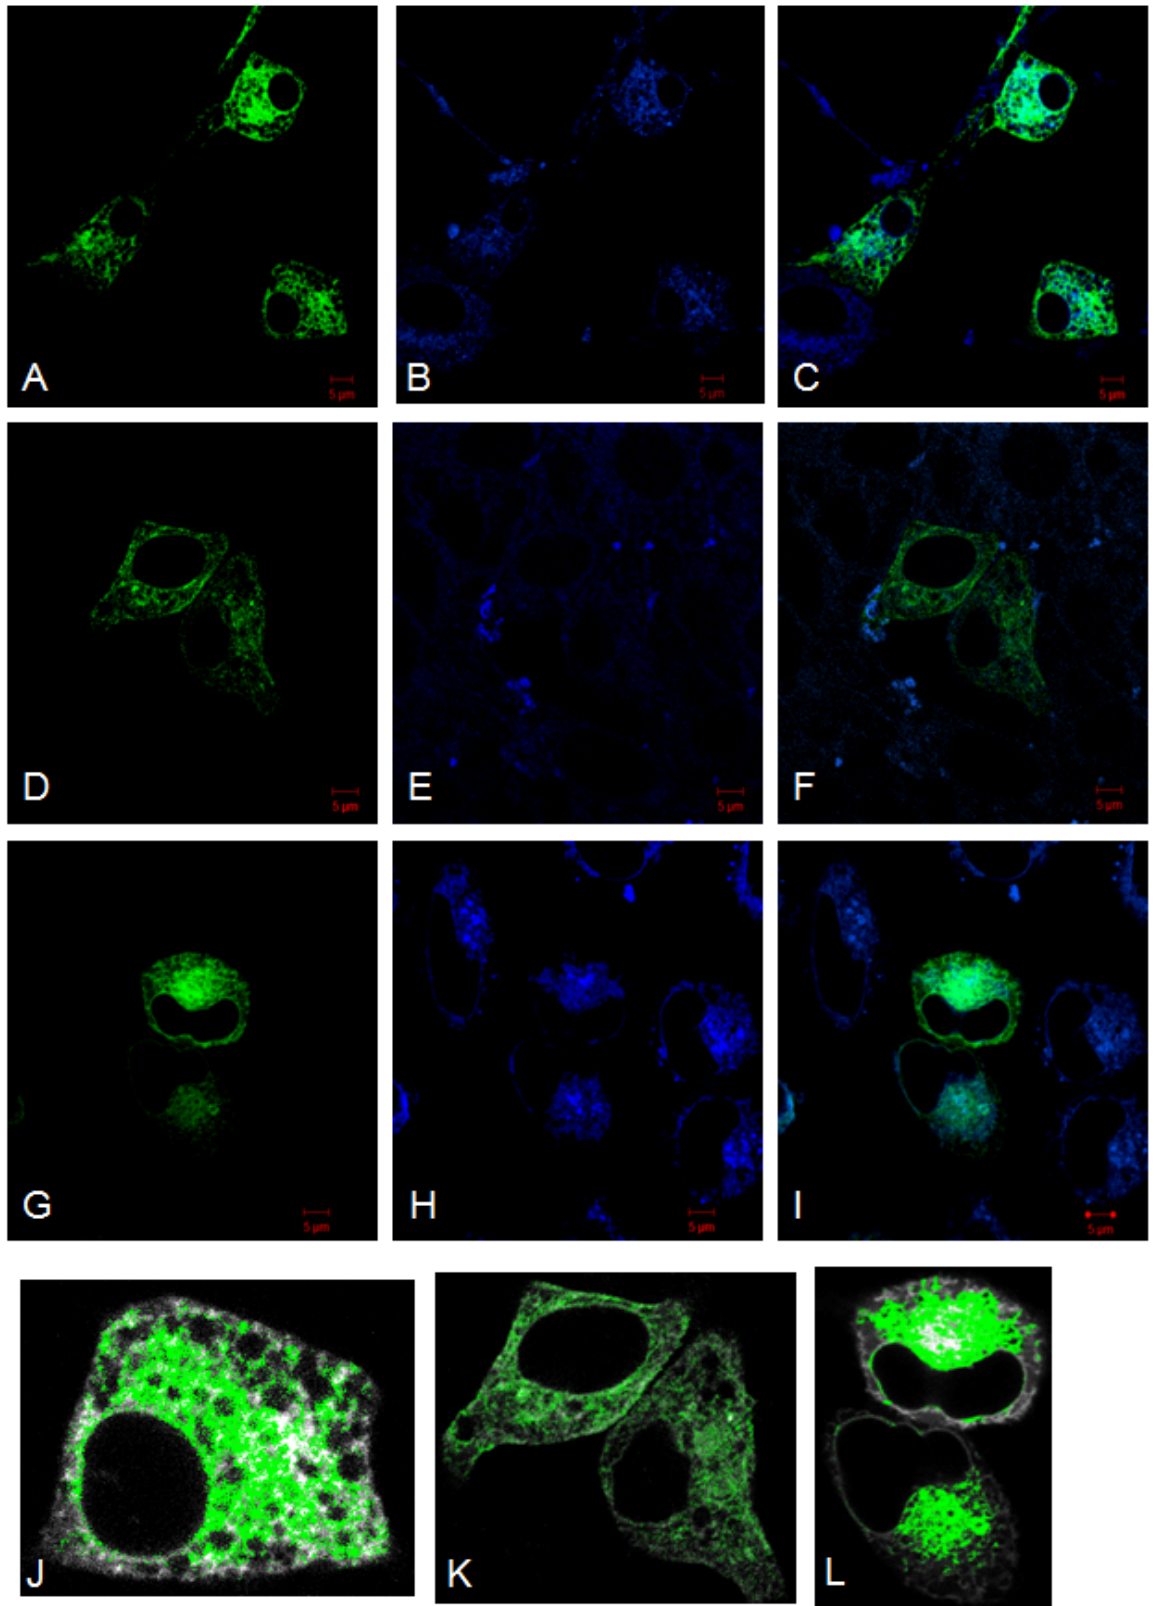

Supplementary Figure 6

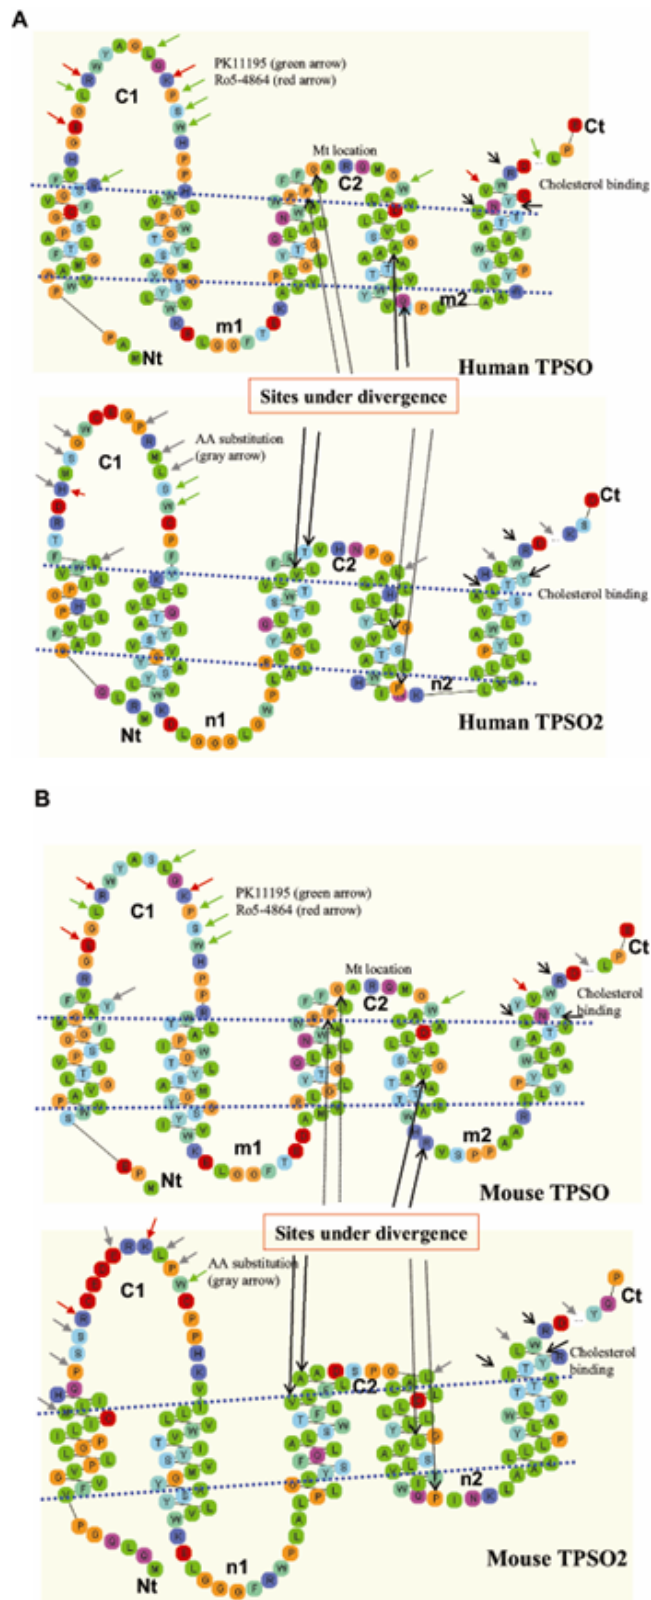

**M**

$> O^2$

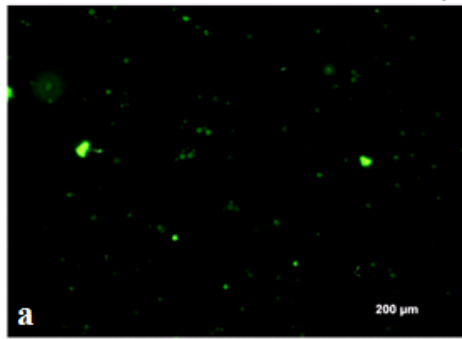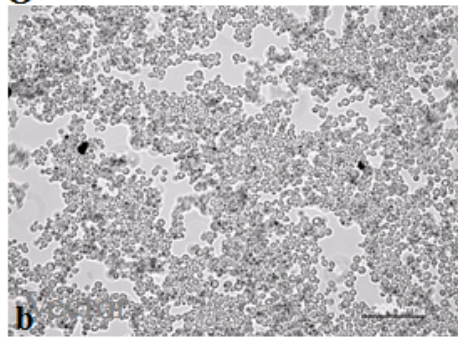

**Vector**

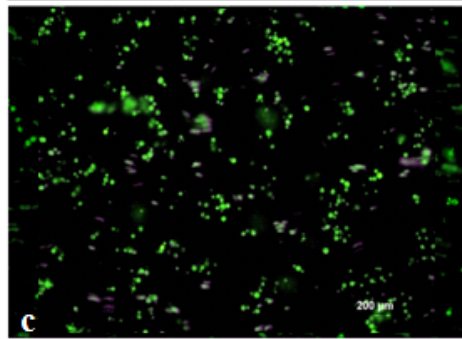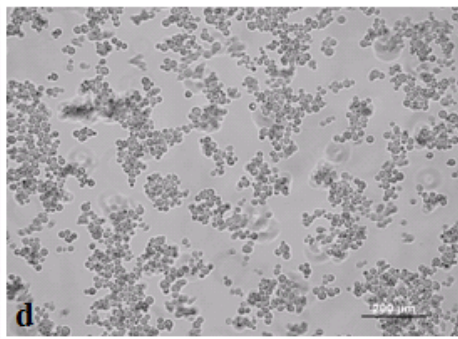

**mTSPO2**

**N**

$< O^2$

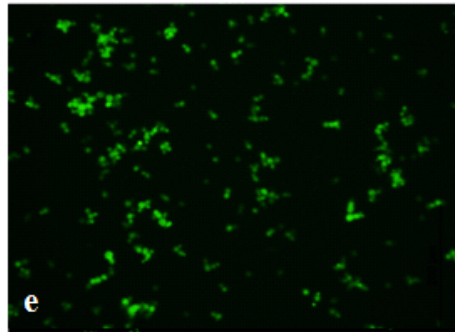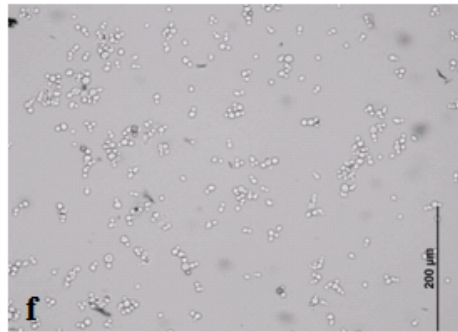

**Vector**

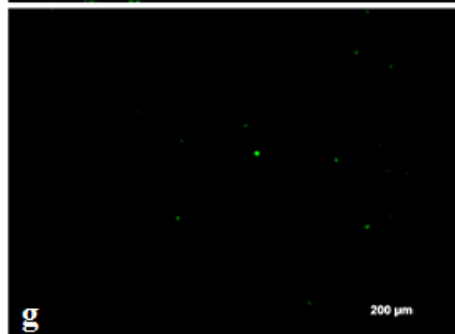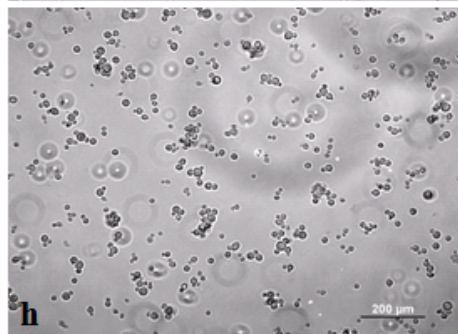

**mTSPO2**

Supplementary Figure 8

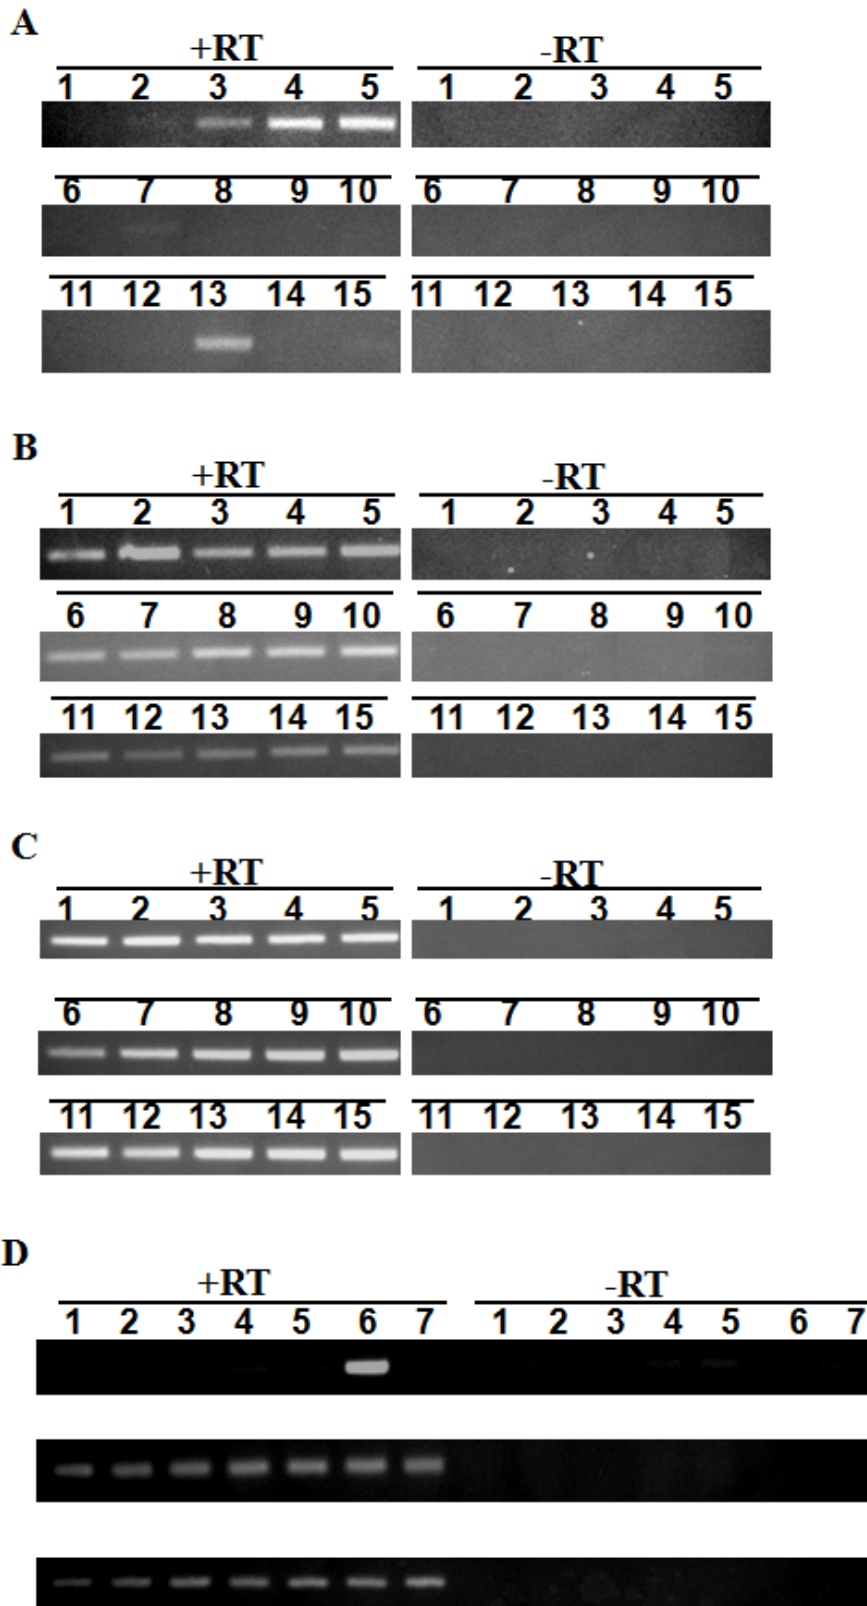

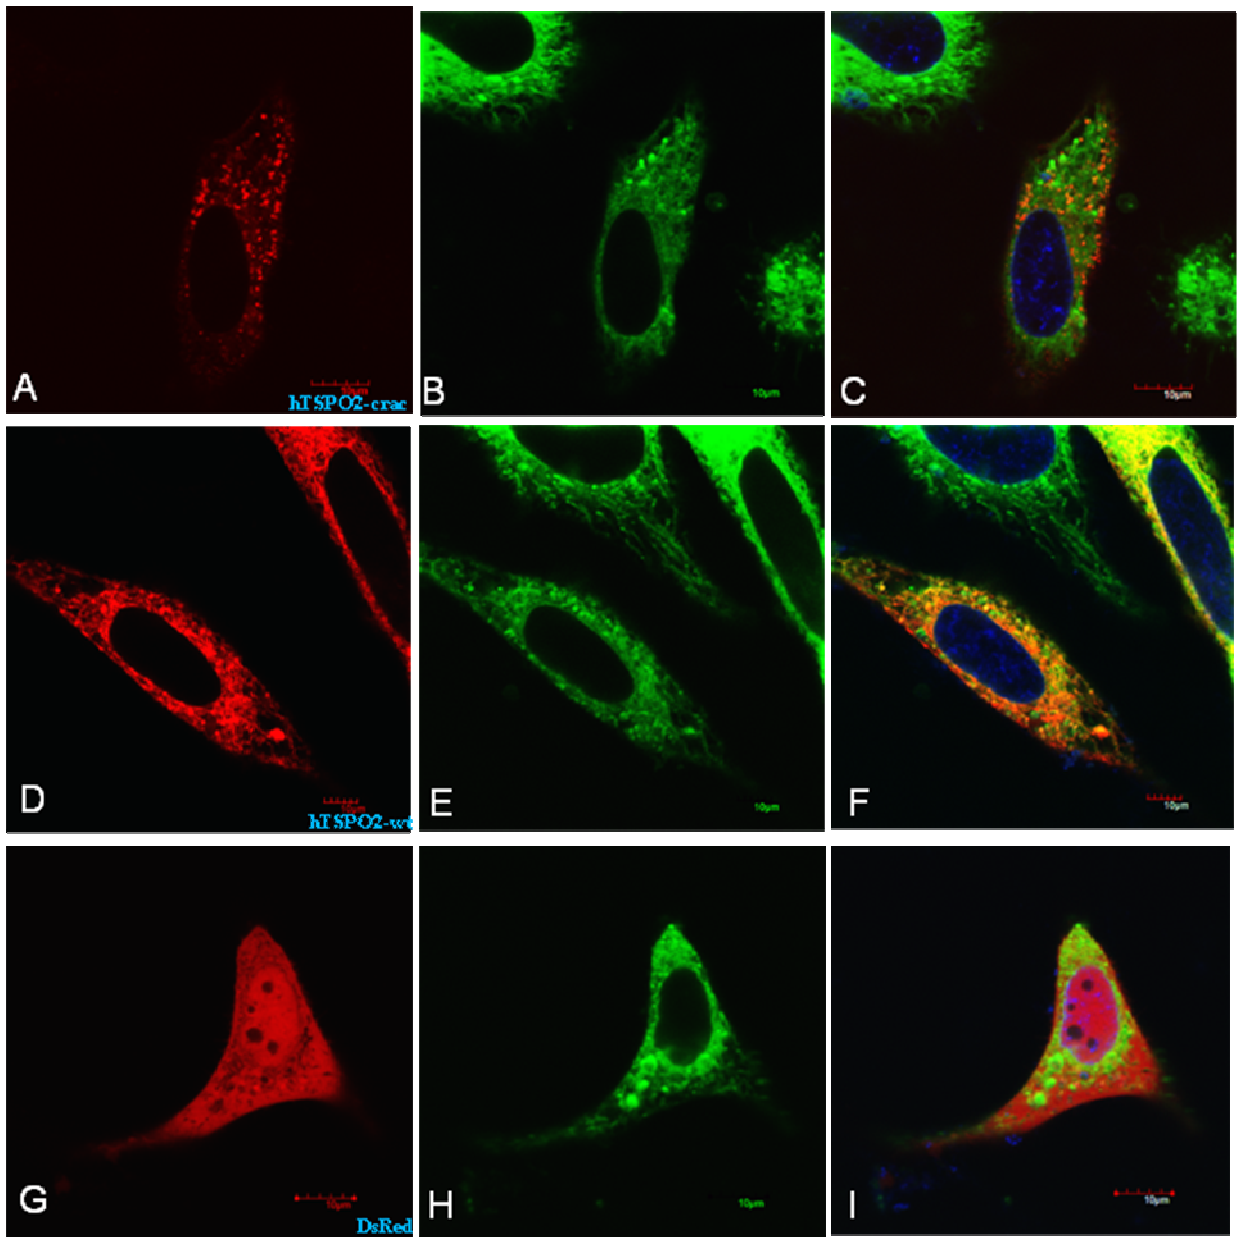

Supplementary Figure 9  
(cont.)

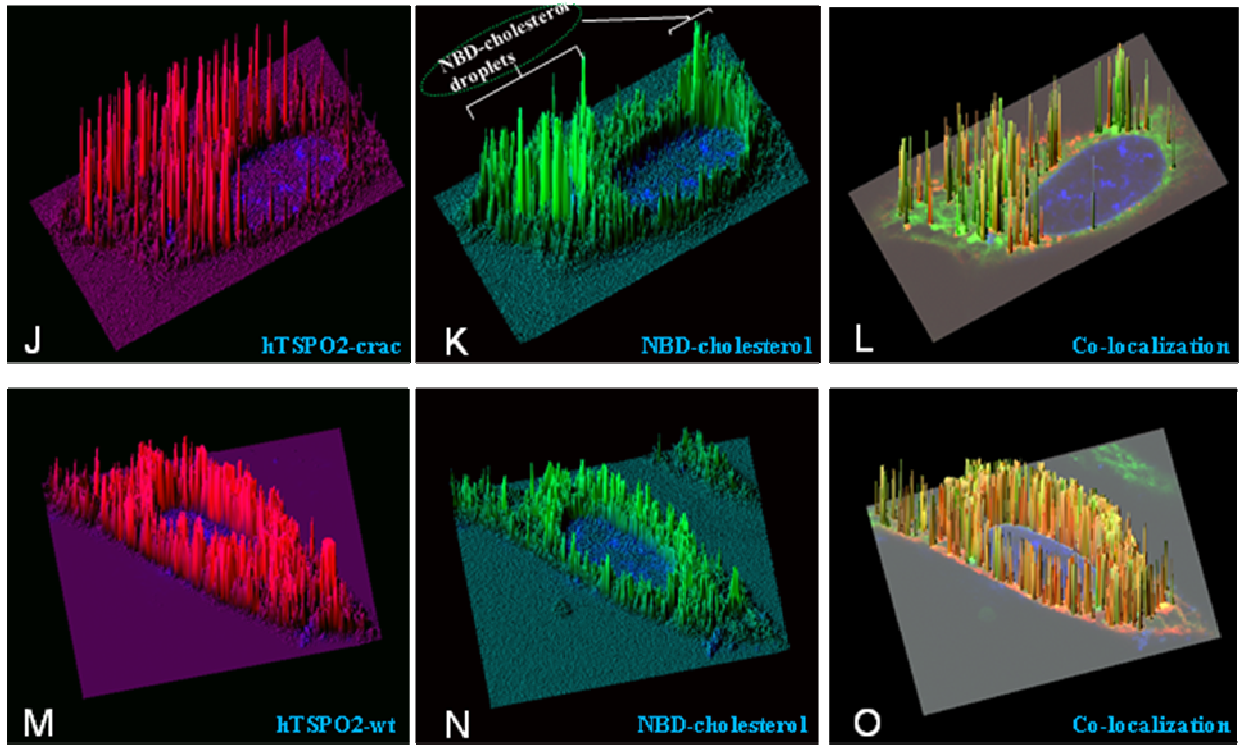

Supplement: supp_M109.029876_jbc.M109.029876-1.pdf [file supp_M109.029876_jbc.M109.029876-1.pdf]
